# Supplementary material for: Determining the Molecular Background of Endometrial Receptivity in Adenomyosis
Source: MDPI journal article supplement (doi:10.3390/biom10091311), 2020-09-11

Construction of PPIN from  
adenomyosis,  
endometriosis and healthy  
gene lists using STRING

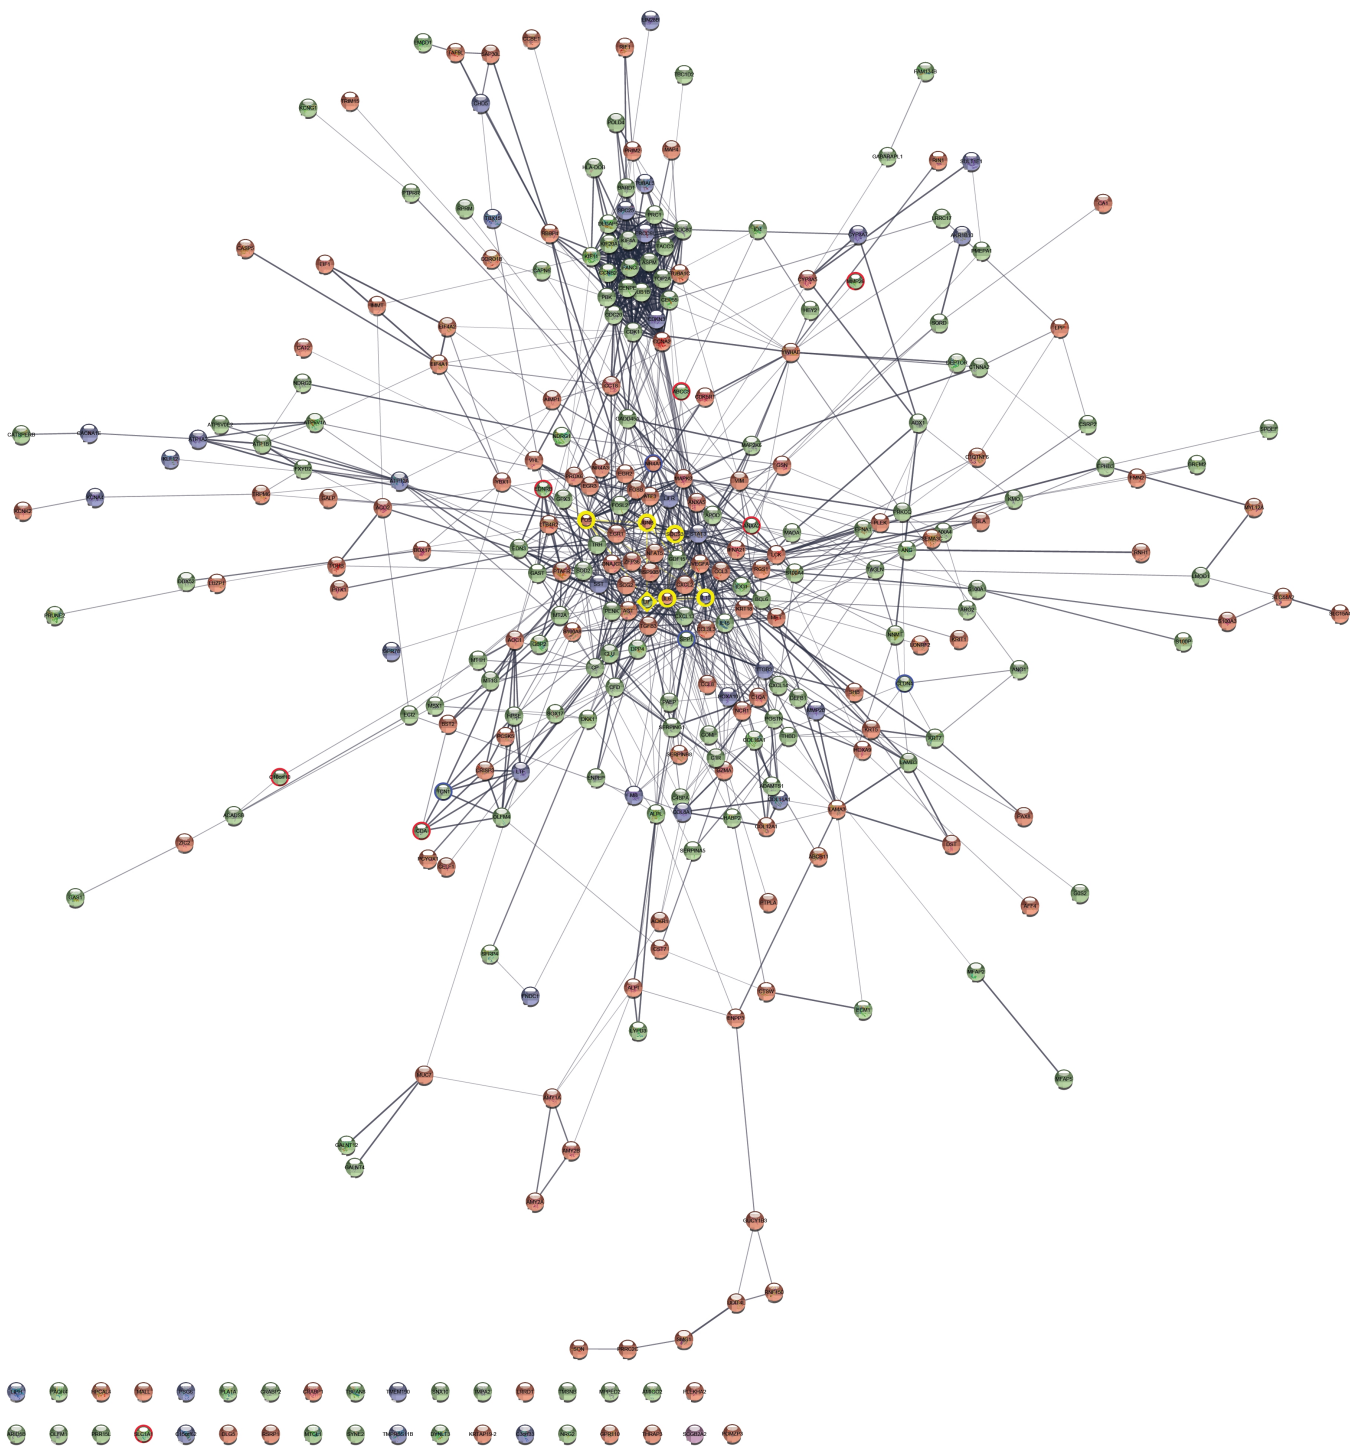

Edge-weighted Spring Embedded Layout with the attribute "score"  
(316 nodes, 1130 edges)

MLC clustering;  
• Granularity parameter: 2.5  
• Array source: the overall  
STRING confidence score

| LEGEND: | Node Fill Color                      | STATUS                  |
|---------|--------------------------------------|-------------------------|
|         | <span style="color: blue;">■</span>  | Adenomyosis gene list   |
|         | <span style="color: red;">■</span>   | Endometriosis gene list |
|         | <span style="color: green;">■</span> | Healthy gene list       |

Green nodes mapped to healthy gene list that are encircled with blue or red refer to a shared genes with adenomyosis and endometriosis gene list, respectively. Shared SCGB2A2 node between adenomyosis, endometriosis and healthy genes is marked with violet color. Yellow encircled nodes and edges refer to prioritized candidate genes used in validation experiment.

# Obtained clusters

Cluster 1  
(46 nodes, 210  
edges)

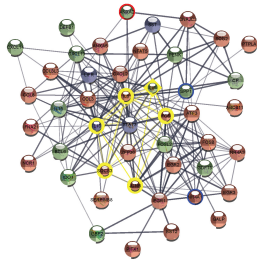

Cluster 2  
(26 nodes, 225  
edges)

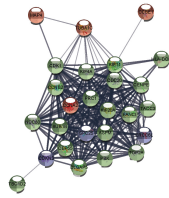

Cluster 3  
(11 nodes, 12  
edges)

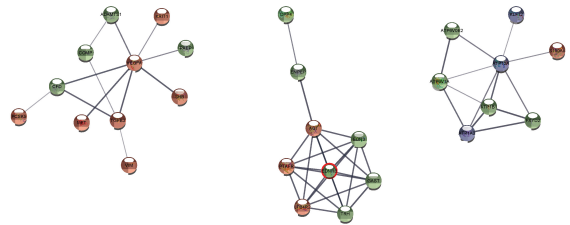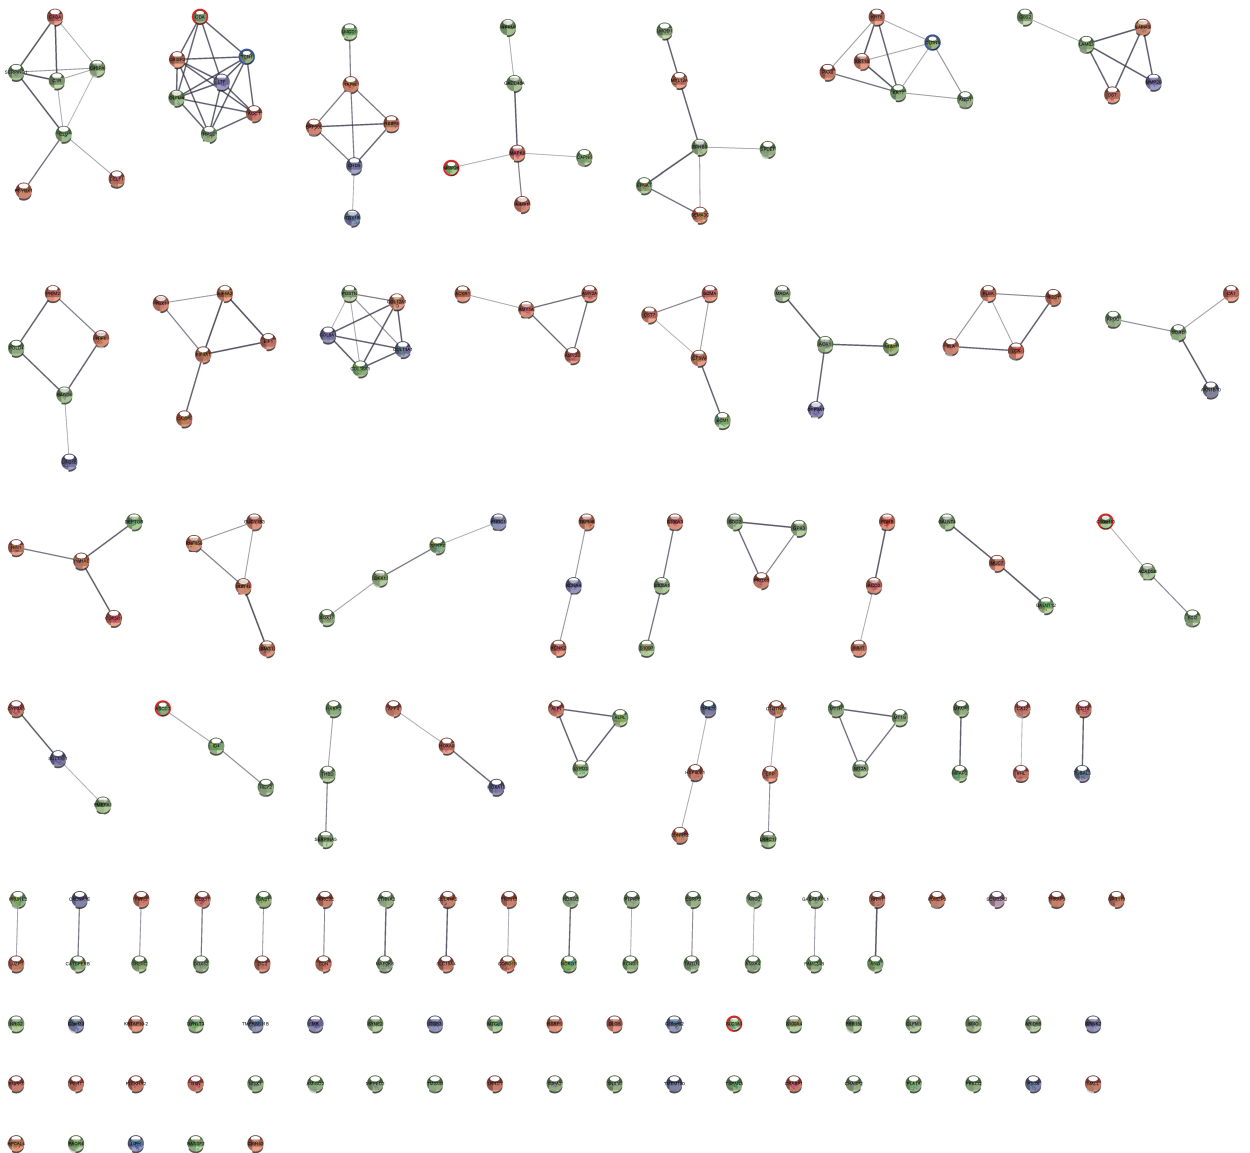

Zoom of cluster 1, 2 and 3

**Cluster 1**  
(46 nodes, 210 edges)

**Cluster 1**  
(46 nodes, 210 edges)

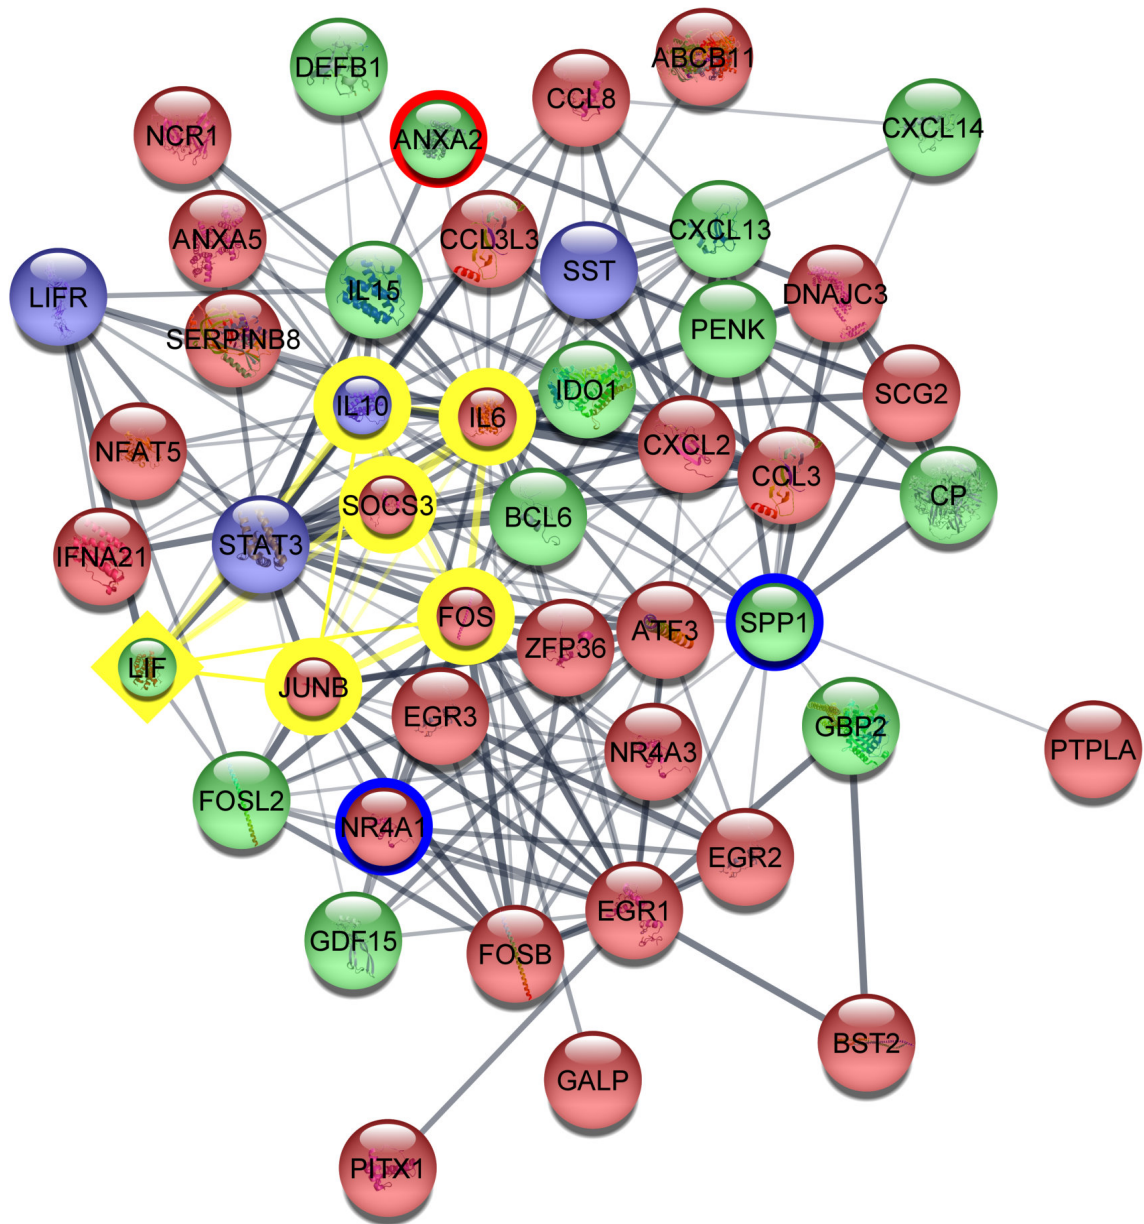

## Cluster 2

(26 nodes, 225 edges)

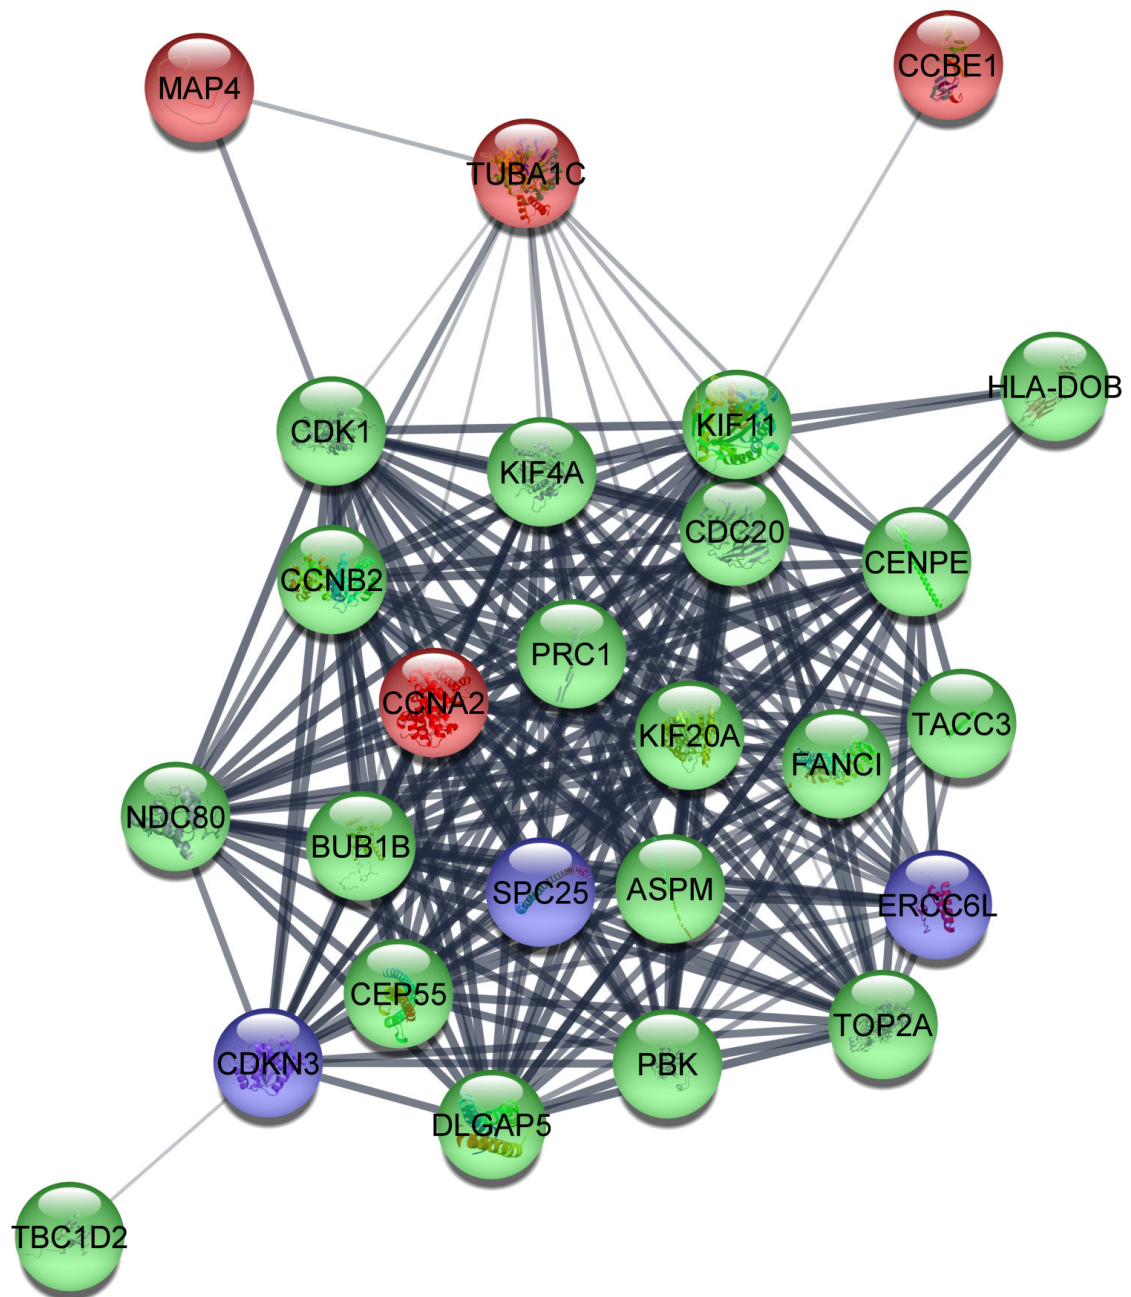



**Cluster 3**  
(11 nodes, 12 edges)

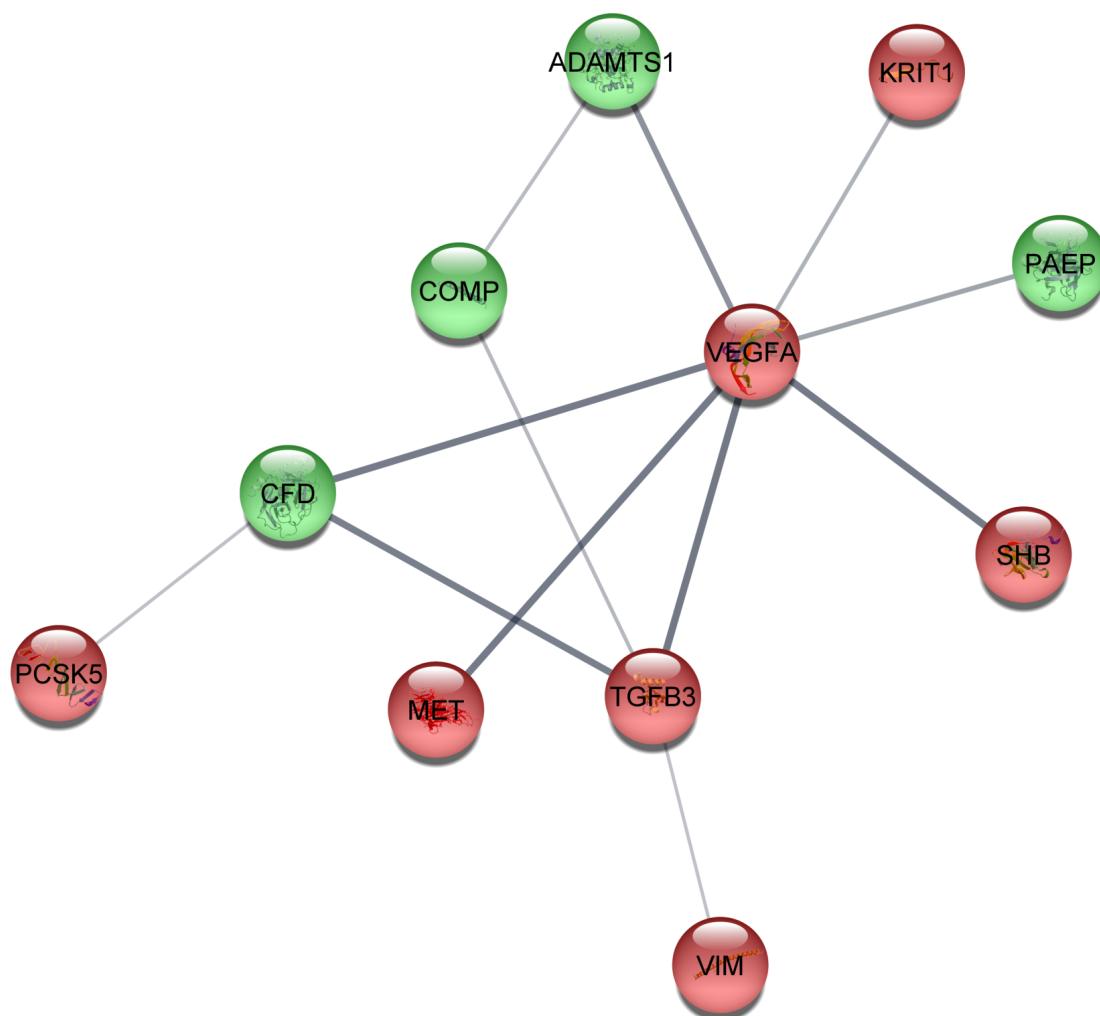

Supplement: s1 [file s1]
