# Supplementary material for: Determining the Molecular Background of Endometrial Receptivity in Adenomyosis
Source: Biomolecules. 2020 Sep 11;10(9):1311. doi: 10.3390/biom10091311 (PMC7563201; doi:10.3390/biom10091311)
Supplement: Supplementary file 1 [file biomolecules-10-01311-s001.zip › Supplementary Figure S1_GSEA after PPIN clustering.xlsx]

## Sheet: Cluster1
# background genes	# genes	category	description	FDR value	genes	network.SUID	nodes.SUID	PMID	term name	year
91	35	GO Process	response to organic substance	2.43e-06	EGR1|EGR2|FOSB|LIF|BST2|GDF15|LIFR|STAT3|CXCL13|SST|ANXA5|IL15|JUNB|FOS|EGR3|PENK|SOCS3|ATF3|ANXA2|GALP|GBP2|IFNA21|CCL8|SPP1|BCL6|IL6|IL10|CXCL2|IDO1|NR4A1|ZFP36|DNAJC3|CCL3|CCL3L3|NR4A3	3953	317|316|220|312|303|230|186|228|204|67|265|267|359|263|315|322|163|334|269|61|76|159|83|240|149|152|271|129|333|153|199|108|80|173|151		GO.0010033	2020
73	32	GO Process	cellular response to organic substance	2.43e-06	EGR1|EGR2|FOSB|LIF|BST2|GDF15|LIFR|STAT3|CXCL13|SST|IL15|JUNB|FOS|EGR3|PENK|SOCS3|ATF3|ANXA2|GBP2|IFNA21|CCL8|SPP1|BCL6|IL6|IL10|CXCL2|NR4A1|ZFP36|DNAJC3|CCL3|CCL3L3|NR4A3	3953	317|316|220|312|303|230|186|228|204|67|267|359|263|315|322|163|334|269|76|159|83|240|149|152|271|129|153|199|108|80|173|151		GO.0071310	2020
89	34	GO Process	cellular response to chemical stimulus	2.77e-06	EGR1|EGR2|FOSB|LIF|BST2|GDF15|LIFR|STAT3|CXCL13|SST|IL15|JUNB|SCG2|FOS|EGR3|PENK|SOCS3|CXCL14|ATF3|ANXA2|GBP2|IFNA21|CCL8|SPP1|BCL6|IL6|IL10|CXCL2|NR4A1|ZFP36|DNAJC3|CCL3|CCL3L3|NR4A3	3953	317|316|220|312|303|230|186|228|204|67|267|359|177|263|315|322|163|202|334|269|76|159|83|240|149|152|271|129|153|199|108|80|173|151		GO.0070887	2020
120	38	GO Process	response to chemical	5.23e-06	EGR1|EGR2|FOSB|LIF|BST2|GDF15|LIFR|STAT3|CXCL13|SST|ANXA5|IL15|DEFB1|JUNB|SCG2|FOS|EGR3|PENK|SOCS3|CXCL14|ATF3|ANXA2|GALP|GBP2|IFNA21|CCL8|SPP1|BCL6|IL6|IL10|CXCL2|IDO1|NR4A1|ZFP36|DNAJC3|CCL3|CCL3L3|NR4A3	3953	317|316|220|312|303|230|186|228|204|67|265|267|206|359|177|263|315|322|163|202|334|269|61|76|159|83|240|149|152|271|129|333|153|199|108|80|173|151		GO.0042221	2020
69	29	GO Process	response to external stimulus	1.88e-05	EGR2|FOSB|BST2|GDF15|CXCL13|SST|IL15|DEFB1|JUNB|SCG2|FOS|EGR3|PENK|CXCL14|ATF3|GALP|IFNA21|CCL8|SPP1|IL6|IL10|CXCL2|IDO1|NR4A1|ZFP36|DNAJC3|CCL3|CCL3L3|NR4A3	3953	316|220|303|230|204|67|267|206|359|177|263|315|322|202|334|61|159|83|240|152|271|129|333|153|199|108|80|173|151		GO.0009605	2020
31	20	GO Process	cytokine-mediated signaling pathway	4.17e-05	EGR1|LIF|BST2|LIFR|STAT3|CXCL13|IL15|JUNB|FOS|SOCS3|ANXA2|GBP2|IFNA21|CCL8|BCL6|IL6|IL10|CXCL2|CCL3|CCL3L3	3953	317|312|303|186|228|204|267|359|263|163|269|76|159|83|149|152|271|129|80|173		GO.0019221	2020
47	23	GO Process	defense response	0.00013	EGR1|BST2|STAT3|CXCL13|NCR1|IL15|DEFB1|SCG2|FOS|PENK|GALP|GBP2|IFNA21|CCL8|SPP1|BCL6|IL6|IL10|CXCL2|IDO1|DNAJC3|CCL3|CCL3L3	3953	317|303|228|204|260|267|206|177|263|322|61|76|159|83|240|149|152|271|129|333|108|80|173		GO.0006952	2020
40	21	GO Process	cellular response to cytokine stimulus	0.0002	EGR1|LIF|BST2|LIFR|STAT3|CXCL13|IL15|JUNB|FOS|SOCS3|ANXA2|GBP2|IFNA21|CCL8|BCL6|IL6|IL10|CXCL2|ZFP36|CCL3|CCL3L3	3953	317|312|303|186|228|204|267|359|263|163|269|76|159|83|149|152|271|129|199|80|173		GO.0071345	2020
18	14	GO Function	cytokine activity	0.00034	LIF|GDF15|CXCL13|IL15|SCG2|CXCL14|IFNA21|CCL8|SPP1|IL6|IL10|CXCL2|CCL3|CCL3L3	3953	312|230|204|267|177|202|159|83|240|152|271|129|80|173		GO.0005125	2020
19	15	GO Function	cytokine receptor binding	0.00034	LIF|GDF15|LIFR|STAT3|CXCL13|IL15|DEFB1|CXCL14|IFNA21|CCL8|IL6|IL10|CXCL2|CCL3|CCL3L3	3953	312|230|186|228|204|267|206|202|159|83|152|271|129|80|173		GO.0005126	2020
27	17	GO Function	receptor ligand activity	0.00034	LIF|GDF15|CXCL13|SST|IL15|SCG2|PENK|CXCL14|GALP|IFNA21|CCL8|SPP1|IL6|IL10|CXCL2|CCL3|CCL3L3	3953	312|230|204|67|267|177|322|202|61|159|83|240|152|271|129|80|173		GO.0048018	2020
54	23	GO Function	molecular function regulator	0.00034	LIF|BST2|GDF15|CXCL13|SST|ANXA5|IL15|SCG2|PENK|SOCS3|CXCL14|ANXA2|GALP|IFNA21|CCL8|SPP1|SERPINB8|IL6|IL10|CXCL2|DNAJC3|CCL3|CCL3L3	3953	312|303|230|204|67|265|267|177|322|163|202|269|61|159|83|240|261|152|271|129|108|80|173		GO.0098772	2020
31	18	Reactome Pathways	Cytokine Signaling in Immune system	0.00042	EGR1|LIF|BST2|LIFR|STAT3|IL15|JUNB|FOS|SOCS3|ANXA2|GBP2|IFNA21|BCL6|IL6|IL10|CXCL2|CCL3|CCL3L3	3953	317|312|303|186|228|267|359|263|163|269|76|159|149|152|271|129|80|173		HSA-1280215	2020
27	17	GO Process	regulation of signaling receptor activity	0.00046	LIF|GDF15|CXCL13|SST|IL15|SCG2|PENK|CXCL14|GALP|IFNA21|CCL8|SPP1|IL6|IL10|CXCL2|CCL3|CCL3L3	3953	312|230|204|67|267|177|322|202|61|159|83|240|152|271|129|80|173		GO.0010469	2020
79	28	GO Process	positive regulation of cellular metabolic process	0.00047	EGR1|EGR2|FOSB|LIF|GDF15|STAT3|FOSL2|PITX1|IL15|JUNB|FOS|EGR3|SOCS3|ATF3|ANXA2|IFNA21|CCL8|SPP1|BCL6|IL6|IL10|NR4A1|NFAT5|ZFP36|DNAJC3|CCL3|CCL3L3|NR4A3	3953	317|316|220|312|230|228|305|193|267|359|263|315|163|334|269|159|83|240|149|152|271|153|97|199|108|80|173|151		GO.0031325	2020
155	39	GO Process	cellular response to stimulus	0.00048	EGR1|EGR2|FOSB|LIF|BST2|GDF15|LIFR|STAT3|CXCL13|SST|NCR1|ANXA5|IL15|DEFB1|JUNB|SCG2|FOS|EGR3|PENK|SOCS3|CXCL14|ATF3|ANXA2|GALP|GBP2|IFNA21|CCL8|SPP1|BCL6|IL6|IL10|CXCL2|NR4A1|NFAT5|ZFP36|DNAJC3|CCL3|CCL3L3|NR4A3	3953	317|316|220|312|303|230|186|228|204|67|260|265|267|206|359|177|263|315|322|163|202|334|269|61|76|159|83|240|149|152|271|129|153|97|199|108|80|173|151		GO.0051716	2020
15	13	UniProt Keywords	Cytokine	0.00049	LIF|GDF15|CXCL13|IL15|CXCL14|IFNA21|CCL8|SPP1|IL6|IL10|CXCL2|CCL3|CCL3L3	3953	312|230|204|267|202|159|83|240|152|271|129|80|173		KW-0202	2020
132	36	GO Process	signaling	0.0005	EGR1|LIF|BST2|GDF15|LIFR|STAT3|CXCL13|SST|NCR1|ANXA5|IL15|DEFB1|JUNB|SCG2|FOS|EGR3|PENK|SOCS3|CXCL14|ATF3|ANXA2|GALP|GBP2|IFNA21|CCL8|BCL6|IL6|IL10|CXCL2|NR4A1|NFAT5|ZFP36|DNAJC3|CCL3|CCL3L3|NR4A3	3953	317|312|303|230|186|228|204|67|260|265|267|206|359|177|263|315|322|163|202|334|269|61|76|159|83|149|152|271|129|153|97|199|108|80|173|151		GO.0023052	2020
80	28	GO Process	positive regulation of nitrogen compound metabolic process	0.0005	EGR1|EGR2|FOSB|LIF|GDF15|STAT3|FOSL2|PITX1|IL15|JUNB|FOS|EGR3|SOCS3|ATF3|ANXA2|IFNA21|CCL8|SPP1|BCL6|IL6|IL10|NR4A1|NFAT5|ZFP36|DNAJC3|CCL3|CCL3L3|NR4A3	3953	317|316|220|312|230|228|305|193|267|359|263|315|163|334|269|159|83|240|149|152|271|153|97|199|108|80|173|151		GO.0051173	2020
126	35	GO Process	signal transduction	0.00056	EGR1|LIF|BST2|GDF15|LIFR|STAT3|CXCL13|SST|NCR1|ANXA5|IL15|DEFB1|JUNB|SCG2|FOS|PENK|SOCS3|CXCL14|ATF3|ANXA2|GALP|GBP2|IFNA21|CCL8|BCL6|IL6|IL10|CXCL2|NR4A1|NFAT5|ZFP36|DNAJC3|CCL3|CCL3L3|NR4A3	3953	317|312|303|230|186|228|204|67|260|265|267|206|359|177|263|322|163|202|334|269|61|76|159|83|149|152|271|129|153|97|199|108|80|173|151		GO.0007165	2020
82	28	GO Process	positive regulation of macromolecule metabolic process	0.00063	EGR1|EGR2|FOSB|LIF|GDF15|STAT3|FOSL2|PITX1|IL15|JUNB|FOS|EGR3|SOCS3|ATF3|ANXA2|IFNA21|CCL8|SPP1|BCL6|IL6|IL10|NR4A1|NFAT5|ZFP36|DNAJC3|CCL3|CCL3L3|NR4A3	3953	317|316|220|312|230|228|305|193|267|359|263|315|163|334|269|159|83|240|149|152|271|153|97|199|108|80|173|151		GO.0010604	2020
136	36	GO Process	cell communication	0.00081	EGR1|LIF|BST2|GDF15|LIFR|STAT3|CXCL13|SST|NCR1|ANXA5|IL15|DEFB1|JUNB|SCG2|FOS|EGR3|PENK|SOCS3|CXCL14|ATF3|ANXA2|GALP|GBP2|IFNA21|CCL8|BCL6|IL6|IL10|CXCL2|NR4A1|NFAT5|ZFP36|DNAJC3|CCL3|CCL3L3|NR4A3	3953	317|312|303|230|186|228|204|67|260|265|267|206|359|177|263|315|322|163|202|334|269|61|76|159|83|149|152|271|129|153|97|199|108|80|173|151		GO.0007154	2020
129	35	GO Process	positive regulation of cellular process	0.00081	EGR1|EGR2|FOSB|LIF|GDF15|LIFR|STAT3|FOSL2|PITX1|CXCL13|IL15|DEFB1|JUNB|SCG2|FOS|EGR3|SOCS3|CXCL14|ATF3|ANXA2|IFNA21|CCL8|SPP1|BCL6|IL6|IL10|CXCL2|IDO1|NR4A1|NFAT5|ZFP36|DNAJC3|CCL3|CCL3L3|NR4A3	3953	317|316|220|312|230|186|228|305|193|204|267|206|359|177|263|315|163|202|334|269|159|83|240|149|152|271|129|333|153|97|199|108|80|173|151		GO.0048522	2020
30	17	GO Process	response to other organism	0.00081	BST2|CXCL13|DEFB1|JUNB|FOS|PENK|CXCL14|GALP|IFNA21|CCL8|IL6|IL10|CXCL2|IDO1|ZFP36|DNAJC3|CCL3	3953	303|204|206|359|263|322|202|61|159|83|152|271|129|333|199|108|80		GO.0051707	2020
147	37	GO Process	positive regulation of biological process	0.0011	EGR1|EGR2|FOSB|LIF|GDF15|LIFR|STAT3|FOSL2|PITX1|CXCL13|IL15|DEFB1|JUNB|SCG2|FOS|EGR3|PENK|SOCS3|CXCL14|ATF3|ANXA2|PTPLA|IFNA21|CCL8|SPP1|BCL6|IL6|IL10|CXCL2|IDO1|NR4A1|NFAT5|ZFP36|DNAJC3|CCL3|CCL3L3|NR4A3	3953	317|316|220|312|230|186|228|305|193|204|267|206|359|177|263|315|322|163|202|334|269|329|159|83|240|149|152|271|129|333|153|97|199|108|80|173|151		GO.0048518	2020
53	21	GO Function	signaling receptor binding	0.0013	LIF|GDF15|LIFR|STAT3|CXCL13|SST|IL15|DEFB1|SCG2|PENK|CXCL14|GALP|IFNA21|CCL8|SPP1|IL6|IL10|CXCL2|CCL3|CCL3L3|NR4A3	3953	312|230|186|228|204|67|267|206|177|322|202|61|159|83|240|152|271|129|80|173|151		GO.0005102	2020
21	14	GO Process	inflammatory response	0.0013	STAT3|CXCL13|IL15|SCG2|FOS|CCL8|SPP1|BCL6|IL6|IL10|CXCL2|IDO1|CCL3|CCL3L3	3953	228|204|267|177|263|83|240|149|152|271|129|333|80|173		GO.0006954	2020
17	12	GO Function	DNA-binding transcription activator activity, RNA polymerase II-specific	0.0017	EGR1|EGR2|FOSB|STAT3|FOSL2|PITX1|JUNB|FOS|ATF3|NR4A1|NFAT5|NR4A3	3953	317|316|220|228|305|193|359|263|334|153|97|151		GO.0001228	2020
165	38	GO Function	protein binding	0.0017	EGR1|EGR2|FOSB|LIF|BST2|GDF15|LIFR|CP|STAT3|PITX1|CXCL13|SST|IL15|DEFB1|JUNB|SCG2|FOS|PENK|SOCS3|CXCL14|ATF3|ANXA2|GALP|PTPLA|GBP2|IFNA21|CCL8|SPP1|BCL6|IL6|IL10|CXCL2|NR4A1|ZFP36|DNAJC3|CCL3|CCL3L3|NR4A3	3953	317|316|220|312|303|230|186|308|228|193|204|67|267|206|359|177|263|322|163|202|334|269|61|329|76|159|83|240|149|152|271|129|153|199|108|80|173|151		GO.0005515	2020
15	12	KEGG Pathways	Cytokine-cytokine receptor interaction	0.002	LIF|LIFR|CXCL13|IL15|CXCL14|IFNA21|CCL8|IL6|IL10|CXCL2|CCL3|CCL3L3	3953	312|186|204|267|202|159|83|152|271|129|80|173		map04060	2020
35	17	GO Process	response to lipid	0.0029	FOSB|STAT3|CXCL13|SST|IL15|JUNB|FOS|PENK|SPP1|IL6|IL10|CXCL2|IDO1|NR4A1|ZFP36|CCL3|NR4A3	3953	220|228|204|67|267|359|263|322|240|152|271|129|333|153|199|80|151		GO.0033993	2020
64	23	GO Process	regulation of cell population proliferation	0.0032	EGR1|LIF|LIFR|STAT3|FOSL2|CXCL13|SST|IL15|JUNB|SCG2|EGR3|ATF3|ANXA2|CCL8|BCL6|IL6|IL10|CXCL2|IDO1|NR4A1|ZFP36|CCL3L3|NR4A3	3953	317|312|186|228|305|204|67|267|359|177|315|334|269|83|149|152|271|129|333|153|199|173|151		GO.0042127	2020
32	16	GO Process	positive regulation of transcription by RNA polymerase II	0.0038	EGR1|EGR2|FOSB|LIF|STAT3|FOSL2|PITX1|JUNB|FOS|EGR3|ATF3|IL6|IL10|NR4A1|NFAT5|NR4A3	3953	317|316|220|312|228|305|193|359|263|315|334|152|271|153|97|151		GO.0045944	2020
113	31	GO Process	regulation of response to stimulus	0.0041	EGR1|LIF|BST2|GDF15|LIFR|STAT3|CXCL13|SST|NCR1|IL15|SCG2|FOS|PENK|SOCS3|CXCL14|ATF3|ANXA2|GALP|IFNA21|CCL8|SPP1|BCL6|IL6|IL10|CXCL2|IDO1|NFAT5|DNAJC3|CCL3|CCL3L3|NR4A3	3953	317|312|303|230|186|228|204|67|260|267|177|263|322|163|202|334|269|61|159|83|240|149|152|271|129|333|97|108|80|173|151		GO.0048583	2020
41	18	GO Process	positive regulation of RNA metabolic process	0.0041	EGR1|EGR2|FOSB|LIF|STAT3|FOSL2|PITX1|JUNB|FOS|EGR3|ATF3|SPP1|IL6|IL10|NR4A1|NFAT5|ZFP36|NR4A3	3953	317|316|220|312|228|305|193|359|263|315|334|240|152|271|153|97|199|151		GO.0051254	2020
24	14	Reactome Pathways	Signaling by Interleukins	0.0042	LIF|LIFR|STAT3|IL15|JUNB|FOS|SOCS3|ANXA2|BCL6|IL6|IL10|CXCL2|CCL3|CCL3L3	3953	312|186|228|267|359|263|163|269|149|152|271|129|80|173		HSA-449147	2020
28	14	GO Function	DNA-binding transcription factor activity, RNA polymerase II-specific	0.0043	EGR1|EGR2|FOSB|STAT3|FOSL2|PITX1|JUNB|FOS|EGR3|ATF3|BCL6|NR4A1|NFAT5|NR4A3	3953	317|316|220|228|305|193|359|263|315|334|149|153|97|151		GO.0000981	2020
95	28	GO Process	response to stress	0.0043	EGR1|BST2|STAT3|CXCL13|SST|NCR1|ANXA5|IL15|DEFB1|SCG2|FOS|PENK|ATF3|GALP|GBP2|IFNA21|CCL8|SPP1|BCL6|IL6|IL10|CXCL2|IDO1|ZFP36|DNAJC3|CCL3|CCL3L3|NR4A3	3953	317|303|228|204|67|260|265|267|206|177|263|322|334|61|76|159|83|240|149|152|271|129|333|199|108|80|173|151		GO.0006950	2020
51	20	GO Process	positive regulation of gene expression	0.0043	EGR1|EGR2|FOSB|LIF|STAT3|FOSL2|PITX1|JUNB|FOS|EGR3|ATF3|SPP1|IL6|IL10|NR4A1|NFAT5|ZFP36|DNAJC3|CCL3|NR4A3	3953	317|316|220|312|228|305|193|359|263|315|334|240|152|271|153|97|199|108|80|151		GO.0010628	2020
37	17	GO Process	positive regulation of transcription, DNA-templated	0.0043	EGR1|EGR2|FOSB|LIF|STAT3|FOSL2|PITX1|JUNB|FOS|EGR3|ATF3|SPP1|IL6|IL10|NR4A1|NFAT5|NR4A3	3953	317|316|220|312|228|305|193|359|263|315|334|240|152|271|153|97|151		GO.0045893	2020
51	20	GO Process	response to oxygen-containing compound	0.0043	EGR1|EGR2|FOSB|STAT3|CXCL13|SST|IL15|JUNB|FOS|PENK|GALP|SPP1|IL6|IL10|CXCL2|IDO1|NR4A1|ZFP36|CCL3|NR4A3	3953	317|316|220|228|204|67|267|359|263|322|61|240|152|271|129|333|153|199|80|151		GO.1901700	2020
57	21	GO Process	immune response	0.0048	EGR1|LIF|BST2|STAT3|CXCL13|IL15|DEFB1|CXCL14|ANXA2|GALP|GBP2|IFNA21|CCL8|BCL6|IL6|IL10|CXCL2|DNAJC3|CCL3|CCL3L3|NR4A3	3953	317|312|303|228|204|267|206|202|269|61|76|159|83|149|152|271|129|108|80|173|151		GO.0006955	2020
47	19	GO Process	response to endogenous stimulus	0.0048	EGR1|EGR2|FOSB|GDF15|STAT3|CXCL13|SST|JUNB|FOS|EGR3|PENK|ANXA2|GALP|SPP1|IL6|IL10|NR4A1|ZFP36|NR4A3	3953	317|316|220|230|228|204|67|359|263|315|322|269|61|240|152|271|153|199|151		GO.0009719	2020
47	19	GO Process	positive regulation of macromolecule biosynthetic process	0.0048	EGR1|EGR2|FOSB|LIF|STAT3|FOSL2|PITX1|IL15|JUNB|FOS|EGR3|ATF3|SPP1|IL6|IL10|NR4A1|NFAT5|DNAJC3|NR4A3	3953	317|316|220|312|228|305|193|267|359|263|315|334|240|152|271|153|97|108|151		GO.0010557	2020
47	19	GO Process	positive regulation of cellular biosynthetic process	0.0048	EGR1|EGR2|FOSB|LIF|STAT3|FOSL2|PITX1|IL15|JUNB|FOS|EGR3|ATF3|SPP1|IL6|IL10|NR4A1|NFAT5|DNAJC3|NR4A3	3953	317|316|220|312|228|305|193|267|359|263|315|334|240|152|271|153|97|108|151		GO.0031328	2020
68	23	GO Process	multi-organism process	0.0051	FOSB|LIF|BST2|STAT3|CXCL13|DEFB1|JUNB|FOS|PENK|CXCL14|ANXA2|GALP|IFNA21|CCL8|SPP1|BCL6|IL6|IL10|CXCL2|IDO1|ZFP36|DNAJC3|CCL3	3953	220|312|303|228|204|206|359|263|322|202|269|61|159|83|240|149|152|271|129|333|199|108|80		GO.0051704	2020
97	28	GO Process	regulation of molecular function	0.0052	EGR1|LIF|BST2|GDF15|STAT3|CXCL13|SST|ANXA5|IL15|SCG2|FOS|PENK|SOCS3|CXCL14|ANXA2|GALP|IFNA21|CCL8|SPP1|SERPINB8|BCL6|IL6|IL10|CXCL2|ZFP36|DNAJC3|CCL3|CCL3L3	3953	317|312|303|230|228|204|67|265|267|177|263|322|163|202|269|61|159|83|240|261|149|152|271|129|199|108|80|173		GO.0065009	2020
8	8	GO Function	chemokine receptor binding	0.0053	STAT3|CXCL13|DEFB1|CXCL14|CCL8|CXCL2|CCL3|CCL3L3	3953	228|204|206|202|83|129|80|173		GO.0042379	2020
29	14	GO Function	sequence-specific DNA binding	0.0053	EGR1|EGR2|FOSB|STAT3|FOSL2|PITX1|JUNB|FOS|EGR3|ATF3|BCL6|NR4A1|NFAT5|NR4A3	3953	317|316|220|228|305|193|359|263|315|334|149|153|97|151		GO.0043565	2020
19	12	GO Process	transcription by RNA polymerase II	0.0054	EGR1|EGR2|FOSB|STAT3|FOSL2|PITX1|JUNB|FOS|ATF3|NR4A1|NFAT5|NR4A3	3953	317|316|220|228|305|193|359|263|334|153|97|151		GO.0006366	2020
22	12	GO Function	RNA polymerase II regulatory region sequence-specific DNA binding	0.0056	EGR1|EGR2|FOSB|STAT3|FOSL2|PITX1|JUNB|FOS|ATF3|BCL6|NFAT5|NR4A3	3953	317|316|220|228|305|193|359|263|334|149|97|151		GO.0000977	2020
12	9	GO Function	G protein-coupled receptor binding	0.0058	STAT3|CXCL13|DEFB1|PENK|CXCL14|CCL8|CXCL2|CCL3|CCL3L3	3953	228|204|206|322|202|83|129|80|173		GO.0001664	2020
36	16	GO Process	response to organic cyclic compound	0.0072	EGR1|FOSB|STAT3|SST|IL15|JUNB|FOS|PENK|IFNA21|SPP1|IL6|IL10|NR4A1|ZFP36|CCL3|NR4A3	3953	317|220|228|67|267|359|263|322|159|240|152|271|153|199|80|151		GO.0014070	2020
51	19	GO Process	regulation of immune system process	0.0091	LIF|BST2|STAT3|CXCL13|NCR1|IL15|FOS|EGR3|SOCS3|CXCL14|CCL8|BCL6|IL6|IL10|CXCL2|IDO1|ZFP36|CCL3|NR4A3	3953	312|303|228|204|260|267|263|315|163|202|83|149|152|271|129|333|199|80|151		GO.0002682	2020
219	43	GO Process	regulation of cellular process	0.0091	EGR1|EGR2|FOSB|LIF|BST2|GDF15|LIFR|STAT3|FOSL2|PITX1|CXCL13|SST|NCR1|ANXA5|IL15|DEFB1|JUNB|SCG2|FOS|EGR3|PENK|SOCS3|CXCL14|ATF3|ANXA2|GALP|GBP2|IFNA21|CCL8|SPP1|SERPINB8|BCL6|IL6|IL10|CXCL2|IDO1|NR4A1|NFAT5|ZFP36|DNAJC3|CCL3|CCL3L3|NR4A3	3953	317|316|220|312|303|230|186|228|305|193|204|67|260|265|267|206|359|177|263|315|322|163|202|334|269|61|76|159|83|240|261|149|152|271|129|333|153|97|199|108|80|173|151		GO.0050794	2020
190	40	GO Process	response to stimulus	0.0091	EGR1|EGR2|FOSB|LIF|BST2|GDF15|LIFR|STAT3|CXCL13|SST|NCR1|ANXA5|IL15|DEFB1|JUNB|SCG2|FOS|EGR3|PENK|SOCS3|CXCL14|ATF3|ANXA2|GALP|GBP2|IFNA21|CCL8|SPP1|BCL6|IL6|IL10|CXCL2|IDO1|NR4A1|NFAT5|ZFP36|DNAJC3|CCL3|CCL3L3|NR4A3	3953	317|316|220|312|303|230|186|228|204|67|260|265|267|206|359|177|263|315|322|163|202|334|269|61|76|159|83|240|149|152|271|129|333|153|97|199|108|80|173|151		GO.0050896	2020
17	11	GO Process	cell chemotaxis	0.0091	CXCL13|SCG2|EGR3|CXCL14|CCL8|IL6|IL10|CXCL2|NR4A1|CCL3|CCL3L3	3953	204|177|315|202|83|152|271|129|153|80|173		GO.0060326	2020
21	12	GO Process	response to bacterium	0.0096	CXCL13|DEFB1|JUNB|FOS|PENK|GALP|IL6|IL10|CXCL2|IDO1|ZFP36|CCL3	3953	204|206|359|263|322|61|152|271|129|333|199|80		GO.0009617	2020
29	14	GO Process	chemotaxis	0.0098	EGR2|CXCL13|DEFB1|SCG2|EGR3|CXCL14|CCL8|IL6|IL10|CXCL2|NR4A1|CCL3|CCL3L3|NR4A3	3953	316|204|206|177|315|202|83|152|271|129|153|80|173|151		GO.0006935	2020
73	23	GO Process	cell surface receptor signaling pathway	0.0098	EGR1|LIF|BST2|GDF15|LIFR|STAT3|CXCL13|SST|IL15|JUNB|FOS|SOCS3|ANXA2|GBP2|IFNA21|CCL8|BCL6|IL6|IL10|CXCL2|CCL3|CCL3L3|NR4A3	3953	317|312|303|230|186|228|204|67|267|359|263|163|269|76|159|83|149|152|271|129|80|173|151		GO.0007166	2020
11	9	GO Process	lymphocyte activation	0.0098	EGR1|BST2|STAT3|NCR1|IL15|IFNA21|BCL6|IL6|IL10	3953	317|303|228|260|267|159|149|152|271		GO.0046649	2020
38	16	GO Process	response to hormone	0.01	EGR1|EGR2|FOSB|STAT3|SST|JUNB|FOS|PENK|ANXA2|GALP|SPP1|IL6|IL10|NR4A1|ZFP36|NR4A3	3953	317|316|220|228|67|359|263|322|269|61|240|152|271|153|199|151		GO.0009725	2020
245	45	GO Process	biological regulation	0.0111	EGR1|EGR2|FOSB|LIF|BST2|GDF15|LIFR|CP|STAT3|FOSL2|PITX1|CXCL13|SST|NCR1|ANXA5|IL15|DEFB1|JUNB|SCG2|FOS|EGR3|PENK|SOCS3|CXCL14|ATF3|ANXA2|GALP|PTPLA|GBP2|IFNA21|CCL8|SPP1|SERPINB8|BCL6|IL6|IL10|CXCL2|IDO1|NR4A1|NFAT5|ZFP36|DNAJC3|CCL3|CCL3L3|NR4A3	3953	317|316|220|312|303|230|186|308|228|305|193|204|67|260|265|267|206|359|177|263|315|322|163|202|334|269|61|329|76|159|83|240|261|149|152|271|129|333|153|97|199|108|80|173|151		GO.0065007	2020
234	44	GO Process	regulation of biological process	0.0134	EGR1|EGR2|FOSB|LIF|BST2|GDF15|LIFR|STAT3|FOSL2|PITX1|CXCL13|SST|NCR1|ANXA5|IL15|DEFB1|JUNB|SCG2|FOS|EGR3|PENK|SOCS3|CXCL14|ATF3|ANXA2|GALP|PTPLA|GBP2|IFNA21|CCL8|SPP1|SERPINB8|BCL6|IL6|IL10|CXCL2|IDO1|NR4A1|NFAT5|ZFP36|DNAJC3|CCL3|CCL3L3|NR4A3	3953	317|316|220|312|303|230|186|228|305|193|204|67|260|265|267|206|359|177|263|315|322|163|202|334|269|61|329|76|159|83|240|261|149|152|271|129|333|153|97|199|108|80|173|151		GO.0050789	2020
35	15	GO Process	cellular response to endogenous stimulus	0.0138	EGR1|FOSB|GDF15|STAT3|CXCL13|SST|JUNB|FOS|EGR3|PENK|SPP1|IL10|NR4A1|ZFP36|NR4A3	3953	317|220|230|228|204|67|359|263|315|322|240|271|153|199|151		GO.0071495	2020
15	9	GO Function	RNA polymerase II proximal promoter sequence-specific DNA binding	0.014	EGR2|FOSB|STAT3|PITX1|JUNB|FOS|ATF3|NFAT5|NR4A3	3953	316|220|228|193|359|263|334|97|151		GO.0000978	2020
93	26	GO Process	regulation of signaling	0.014	EGR1|EGR2|LIF|GDF15|LIFR|STAT3|CXCL13|SST|IL15|SCG2|PENK|SOCS3|CXCL14|ATF3|ANXA2|GALP|IFNA21|CCL8|SPP1|BCL6|IL6|IL10|CXCL2|NFAT5|CCL3|CCL3L3	3953	317|316|312|230|186|228|204|67|267|177|322|163|202|334|269|61|159|83|240|149|152|271|129|97|80|173		GO.0023051	2020
88	25	GO Process	immune system process	0.0162	EGR1|LIF|BST2|STAT3|CXCL13|NCR1|IL15|DEFB1|JUNB|SCG2|CXCL14|ANXA2|GALP|GBP2|IFNA21|CCL8|BCL6|IL6|IL10|CXCL2|IDO1|DNAJC3|CCL3|CCL3L3|NR4A3	3953	317|312|303|228|204|260|267|206|359|177|202|269|61|76|159|83|149|152|271|129|333|108|80|173|151		GO.0002376	2020
6	6	GO Function	chemokine activity	0.0167	CXCL13|CXCL14|CCL8|CXCL2|CCL3|CCL3L3	3953	204|202|83|129|80|173		GO.0008009	2020
6	6	GO Function	CCR chemokine receptor binding	0.0167	STAT3|CXCL13|DEFB1|CCL8|CCL3|CCL3L3	3953	228|204|206|83|80|173		GO.0048020	2020
36	15	GO Process	positive regulation of immune system process	0.0169	LIF|STAT3|CXCL13|IL15|FOS|EGR3|CXCL14|CCL8|BCL6|IL6|IL10|CXCL2|IDO1|CCL3|NR4A3	3953	312|228|204|267|263|315|202|83|149|152|271|129|333|80|151		GO.0002684	2020
36	15	GO Process	positive regulation of cell population proliferation	0.0169	EGR1|LIF|LIFR|STAT3|FOSL2|IL15|SCG2|EGR3|ATF3|ANXA2|BCL6|IL6|IL10|NR4A1|NR4A3	3953	317|312|186|228|305|267|177|315|334|269|149|152|271|153|151		GO.0008284	2020
83	24	GO Process	regulation of signal transduction	0.0178	EGR1|LIF|GDF15|LIFR|STAT3|CXCL13|SST|IL15|SCG2|PENK|SOCS3|CXCL14|ATF3|GALP|IFNA21|CCL8|SPP1|BCL6|IL6|IL10|CXCL2|NFAT5|CCL3|CCL3L3	3953	317|312|230|186|228|204|67|267|177|322|163|202|334|61|159|83|240|149|152|271|129|97|80|173		GO.0009966	2020
32	14	GO Process	response to nitrogen compound	0.0179	EGR1|EGR2|FOSB|STAT3|SST|JUNB|FOS|PENK|GALP|IFNA21|IL6|IL10|NR4A1|NR4A3	3953	317|316|220|228|67|359|263|322|61|159|152|271|153|151		GO.1901698	2020
28	13	GO Process	response to organonitrogen compound	0.0189	EGR1|EGR2|FOSB|STAT3|SST|JUNB|FOS|PENK|GALP|IL6|IL10|NR4A1|NR4A3	3953	317|316|220|228|67|359|263|322|61|152|271|153|151		GO.0010243	2020
13	9	GO Process	leukocyte differentiation	0.0194	EGR1|STAT3|IL15|JUNB|ANXA2|IFNA21|BCL6|IL6|IL10	3953	317|228|267|359|269|159|149|152|271		GO.0002521	2020
102	27	GO Process	cellular macromolecule metabolic process	0.0194	EGR1|EGR2|FOSB|LIF|CP|STAT3|FOSL2|PITX1|IL15|JUNB|SCG2|FOS|EGR3|PENK|SOCS3|ATF3|CCL8|SPP1|BCL6|IL6|IL10|NR4A1|NFAT5|ZFP36|DNAJC3|CCL3|NR4A3	3953	317|316|220|312|308|228|305|193|267|359|177|263|315|322|163|334|83|240|149|152|271|153|97|199|108|80|151		GO.0044260	2020
9	8	KEGG Pathways	Jak-STAT signaling pathway	0.0205	LIF|LIFR|STAT3|IL15|SOCS3|IFNA21|IL6|IL10	3953	312|186|228|267|163|159|152|271		map04630	2020
7	7	KEGG Pathways	Chemokine signaling pathway	0.0213	STAT3|CXCL13|CXCL14|CCL8|CXCL2|CCL3|CCL3L3	3953	228|204|202|83|129|80|173		map04062	2020
247	44	GO Function	binding	0.0215	EGR1|EGR2|FOSB|LIF|BST2|GDF15|LIFR|ABCB11|CP|STAT3|FOSL2|PITX1|CXCL13|SST|ANXA5|IL15|DEFB1|JUNB|SCG2|FOS|EGR3|PENK|SOCS3|CXCL14|ATF3|ANXA2|GALP|PTPLA|GBP2|IFNA21|CCL8|SPP1|BCL6|IL6|IL10|CXCL2|IDO1|NR4A1|NFAT5|ZFP36|DNAJC3|CCL3|CCL3L3|NR4A3	3953	317|316|220|312|303|230|186|243|308|228|305|193|204|67|265|267|206|359|177|263|315|322|163|202|334|269|61|329|76|159|83|240|149|152|271|129|333|153|97|199|108|80|173|151		GO.0005488	2020
57	19	GO Process	regulation of transcription by RNA polymerase II	0.0216	EGR1|EGR2|FOSB|LIF|GDF15|STAT3|FOSL2|PITX1|JUNB|FOS|EGR3|ATF3|BCL6|IL6|IL10|NR4A1|NFAT5|ZFP36|NR4A3	3953	317|316|220|312|230|228|305|193|359|263|315|334|149|152|271|153|97|199|151		GO.0006357	2020
17	10	GO Process	response to lipopolysaccharide	0.0226	CXCL13|JUNB|FOS|PENK|IL6|IL10|CXCL2|IDO1|ZFP36|CCL3	3953	204|359|263|322|152|271|129|333|199|80		GO.0032496	2020
130	31	GO Process	negative regulation of cellular process	0.0239	EGR1|FOSB|LIF|BST2|GDF15|STAT3|PITX1|CXCL13|SST|ANXA5|IL15|JUNB|SCG2|EGR3|SOCS3|CXCL14|ATF3|ANXA2|CCL8|SPP1|SERPINB8|BCL6|IL6|IL10|IDO1|NR4A1|ZFP36|DNAJC3|CCL3|CCL3L3|NR4A3	3953	317|220|312|303|230|228|193|204|67|265|267|359|177|315|163|202|334|269|83|240|261|149|152|271|333|153|199|108|80|173|151		GO.0048523	2020
44	15	GO Function	DNA binding	0.0248	EGR1|EGR2|FOSB|STAT3|FOSL2|PITX1|JUNB|FOS|EGR3|ATF3|BCL6|NR4A1|NFAT5|ZFP36|NR4A3	3953	317|316|220|228|305|193|359|263|315|334|149|153|97|199|151		GO.0003677	2020
92	25	GO Process	regulation of cell communication	0.0257	EGR1|EGR2|LIF|GDF15|LIFR|STAT3|CXCL13|SST|IL15|SCG2|PENK|SOCS3|CXCL14|ATF3|GALP|IFNA21|CCL8|SPP1|BCL6|IL6|IL10|CXCL2|NFAT5|CCL3|CCL3L3	3953	317|316|312|230|186|228|204|67|267|177|322|163|202|334|61|159|83|240|149|152|271|129|97|80|173		GO.0010646	2020
14	9	GO Process	regulation of hemopoiesis	0.0261	LIF|STAT3|IL15|FOS|EGR3|BCL6|ZFP36|CCL3|NR4A3	3953	312|228|267|263|315|149|199|80|151		GO.1903706	2020
8	7	GO Process	lymphocyte differentiation	0.0309	EGR1|STAT3|IL15|IFNA21|BCL6|IL6|IL10	3953	317|228|267|159|149|152|271		GO.0030098	2020
37	15	UniProt Keywords	DNA-binding	0.0349	EGR1|EGR2|FOSB|STAT3|FOSL2|PITX1|JUNB|FOS|EGR3|ATF3|BCL6|NR4A1|NFAT5|ZFP36|NR4A3	3953	317|316|220|228|305|193|359|263|315|334|149|153|97|199|151		KW-0238	2020
50	17	GO Process	organic cyclic compound biosynthetic process	0.0366	EGR1|EGR2|FOSB|ABCB11|STAT3|FOSL2|PITX1|JUNB|FOS|EGR3|ATF3|PTPLA|BCL6|IDO1|NR4A1|NFAT5|NR4A3	3953	317|316|220|243|228|305|193|359|263|315|334|329|149|333|153|97|151		GO.1901362	2020
67	21	Reactome Pathways	Immune System	0.0372	EGR1|LIF|BST2|LIFR|STAT3|NCR1|IL15|DEFB1|JUNB|FOS|SOCS3|ANXA2|GBP2|IFNA21|BCL6|IL6|IL10|CXCL2|DNAJC3|CCL3|CCL3L3	3953	317|312|303|186|228|260|267|206|359|263|163|269|76|159|149|152|271|129|108|80|173		HSA-168256	2020
127	30	GO Process	regulation of nitrogen compound metabolic process	0.0378	EGR1|EGR2|FOSB|LIF|BST2|GDF15|STAT3|FOSL2|PITX1|IL15|JUNB|FOS|EGR3|SOCS3|ATF3|ANXA2|IFNA21|CCL8|SPP1|SERPINB8|BCL6|IL6|IL10|NR4A1|NFAT5|ZFP36|DNAJC3|CCL3|CCL3L3|NR4A3	3953	317|316|220|312|303|230|228|305|193|267|359|263|315|163|334|269|159|83|240|261|149|152|271|153|97|199|108|80|173|151		GO.0051171	2020
27	12	GO Process	cellular response to oxygen-containing compound	0.0381	EGR1|STAT3|IL15|FOS|PENK|SPP1|IL6|IL10|NR4A1|ZFP36|CCL3|NR4A3	3953	317|228|267|263|322|240|152|271|153|199|80|151		GO.1901701	2020
128	30	GO Process	regulation of primary metabolic process	0.0421	EGR1|EGR2|FOSB|LIF|BST2|GDF15|STAT3|FOSL2|PITX1|IL15|JUNB|FOS|EGR3|SOCS3|ATF3|ANXA2|IFNA21|CCL8|SPP1|SERPINB8|BCL6|IL6|IL10|NR4A1|NFAT5|ZFP36|DNAJC3|CCL3|CCL3L3|NR4A3	3953	317|316|220|312|303|230|228|305|193|267|359|263|315|163|334|269|159|83|240|261|149|152|271|153|97|199|108|80|173|151		GO.0080090	2020
84	23	GO Process	regulation of cellular biosynthetic process	0.0428	EGR1|EGR2|FOSB|LIF|GDF15|STAT3|FOSL2|PITX1|IL15|JUNB|FOS|EGR3|ATF3|SPP1|BCL6|IL6|IL10|NR4A1|NFAT5|ZFP36|DNAJC3|CCL3|NR4A3	3953	317|316|220|312|230|228|305|193|267|359|263|315|334|240|149|152|271|153|97|199|108|80|151		GO.0031326	2020
9	7	KEGG Pathways	TNF signaling pathway	0.0435	LIF|IL15|JUNB|FOS|SOCS3|IL6|CXCL2	3953	312|267|359|263|163|152|129		map04668	2020
6	6	GO Process	positive regulation of hemopoiesis	0.0446	LIF|STAT3|IL15|FOS|EGR3|BCL6	3953	312|228|267|263|315|149		GO.1903708	2020
129	30	GO Process	regulation of cellular metabolic process	0.0453	EGR1|EGR2|FOSB|LIF|BST2|GDF15|STAT3|FOSL2|PITX1|IL15|JUNB|FOS|EGR3|SOCS3|ATF3|ANXA2|IFNA21|CCL8|SPP1|SERPINB8|BCL6|IL6|IL10|NR4A1|NFAT5|ZFP36|DNAJC3|CCL3|CCL3L3|NR4A3	3953	317|316|220|312|303|230|228|305|193|267|359|263|315|163|334|269|159|83|240|261|149|152|271|153|97|199|108|80|173|151		GO.0031323	2020
9	7	GO Process	modification of morphology or physiology of other organism	0.0453	CXCL13|CXCL14|ANXA2|GALP|CCL8|CXCL2|CCL3	3953	204|202|269|61|83|129|80		GO.0035821	2020
9	7	GO Process	post-translational protein modification	0.0453	CP|SCG2|PENK|SOCS3|SPP1|IL6|DNAJC3	3953	308|177|322|163|240|152|108		GO.0043687	2020
85	23	GO Process	regulation of macromolecule biosynthetic process	0.0469	EGR1|EGR2|FOSB|LIF|GDF15|STAT3|FOSL2|PITX1|IL15|JUNB|FOS|EGR3|ATF3|SPP1|BCL6|IL6|IL10|NR4A1|NFAT5|ZFP36|DNAJC3|CCL3|NR4A3	3953	317|316|220|312|230|228|305|193|267|359|263|315|334|240|149|152|271|153|97|199|108|80|151		GO.0010556	2020
20	10	GO Process	cellular response to organic cyclic compound	0.0482	EGR1|STAT3|IL15|PENK|SPP1|IL10|NR4A1|ZFP36|CCL3|NR4A3	3953	317|228|267|322|240|271|153|199|80|151		GO.0071407	2020
8	7	Reactome Pathways	Interleukin-10 signaling	0.0488	LIF|STAT3|IL6|IL10|CXCL2|CCL3|CCL3L3	3953	312|228|152|271|129|80|173		HSA-6783783	2020

## Sheet: Cluster 2
# background genes	# genes	category	description	FDR value	genes	network.SUID	nodes.SUID	PMID	term name	year
25	20	GO Process	mitotic cell cycle	4.13e-12	DLGAP5|KIF11|NDC80|CENPE|CCNA2|SPC25|BUB1B|CCNB2|FANCI|TACC3|CDKN3|MAP4|CEP55|CDC20|KIF4A|PRC1|KIF20A|CDK1|TOP2A|PBK	4223	272|288|155|224|360|217|208|164|157|221|218|320|273|367|147|68|336|146|296|277		GO.0000278	2020
38	22	GO Process	cell cycle	4.13e-12	DLGAP5|KIF11|NDC80|CENPE|CCNA2|SPC25|BUB1B|CCNB2|FANCI|TACC3|ERCC6L|CDKN3|MAP4|ASPM|CEP55|CDC20|KIF4A|PRC1|KIF20A|CDK1|TOP2A|PBK	4223	272|288|155|224|360|217|208|164|157|221|214|218|320|107|273|367|147|68|336|146|296|277		GO.0007049	2020
22	19	GO Process	cell division	4.85e-12	KIF11|NDC80|CENPE|CCNA2|SPC25|BUB1B|CCNB2|TUBA1C|TACC3|ERCC6L|MAP4|ASPM|CEP55|CDC20|KIF4A|PRC1|KIF20A|CDK1|TOP2A	4223	288|155|224|360|217|208|164|283|221|214|320|107|273|367|147|68|336|146|296		GO.0051301	2020
24	19	GO Process	mitotic cell cycle process	1.14e-11	DLGAP5|KIF11|NDC80|CENPE|CCNA2|SPC25|BUB1B|CCNB2|FANCI|TACC3|CDKN3|MAP4|CEP55|CDC20|KIF4A|PRC1|KIF20A|CDK1|TOP2A	4223	272|288|155|224|360|217|208|164|157|221|218|320|273|367|147|68|336|146|296		GO.1903047	2020
31	20	GO Process	cell cycle process	1.8e-11	DLGAP5|KIF11|NDC80|CENPE|CCNA2|SPC25|BUB1B|CCNB2|FANCI|TACC3|CDKN3|MAP4|ASPM|CEP55|CDC20|KIF4A|PRC1|KIF20A|CDK1|TOP2A	4223	272|288|155|224|360|217|208|164|157|221|218|320|107|273|367|147|68|336|146|296		GO.0022402	2020
25	17	UniProt Keywords	Cell cycle	1.52e-09	DLGAP5|KIF11|NDC80|CENPE|CCNA2|SPC25|BUB1B|CCNB2|FANCI|TACC3|ERCC6L|CDKN3|ASPM|CEP55|CDC20|PRC1|CDK1	4223	272|288|155|224|360|217|208|164|157|221|214|218|107|273|367|68|146		KW-0131	2020
15	14	UniProt Keywords	Cell division	7.08e-09	KIF11|NDC80|CENPE|CCNA2|SPC25|BUB1B|CCNB2|TACC3|ERCC6L|ASPM|CEP55|CDC20|PRC1|CDK1	4223	288|155|224|360|217|208|164|221|214|107|273|367|68|146		KW-0132	2020
14	13	UniProt Keywords	Mitosis	3.07e-08	KIF11|NDC80|CENPE|CCNA2|SPC25|BUB1B|CCNB2|TACC3|ERCC6L|ASPM|CEP55|CDC20|CDK1	4223	288|155|224|360|217|208|164|221|214|107|273|367|146		KW-0498	2020
33	16	GO Component	microtubule cytoskeleton	9.44e-07	DLGAP5|KIF11|NDC80|CENPE|BUB1B|CCNB2|TUBA1C|TACC3|MAP4|ASPM|CEP55|CDC20|KIF4A|PRC1|KIF20A|CDK1	4223	272|288|155|224|208|164|283|221|320|107|273|367|147|68|336|146		GO.0015630	2020
23	14	GO Process	microtubule-based process	1.62e-06	DLGAP5|KIF11|NDC80|CENPE|SPC25|TUBA1C|TACC3|MAP4|ASPM|CDC20|KIF4A|PRC1|KIF20A|CDK1	4223	272|288|155|224|217|283|221|320|107|367|147|68|336|146		GO.0007017	2020
36	16	GO Process	regulation of cell cycle	2.19e-06	DLGAP5|KIF11|NDC80|CENPE|CCNA2|BUB1B|CCNB2|FANCI|TACC3|CDKN3|ASPM|CDC20|PRC1|KIF20A|CDK1|TOP2A	4223	272|288|155|224|360|208|164|157|221|218|107|367|68|336|146|296		GO.0051726	2020
17	12	GO Component	spindle	4.83e-06	DLGAP5|KIF11|CENPE|BUB1B|TACC3|MAP4|ASPM|CDC20|KIF4A|PRC1|KIF20A|CDK1	4223	272|288|224|208|221|320|107|367|147|68|336|146		GO.0005819	2020
41	16	GO Component	cytoskeletal part	4.83e-06	DLGAP5|KIF11|NDC80|CENPE|BUB1B|CCNB2|TUBA1C|TACC3|MAP4|ASPM|CEP55|CDC20|KIF4A|PRC1|KIF20A|CDK1	4223	272|288|155|224|208|164|283|221|320|107|273|367|147|68|336|146		GO.0044430	2020
17	12	Reactome Pathways	Cell Cycle, Mitotic	1.01e-05	NDC80|CENPE|CCNA2|SPC25|BUB1B|CCNB2|TUBA1C|ERCC6L|CDC20|KIF20A|CDK1|TOP2A	4223	155|224|360|217|208|164|283|214|367|336|146|296		HSA-69278	2020
36	14	UniProt Keywords	Cytoskeleton	1.95e-05	DLGAP5|KIF11|CENPE|BUB1B|TUBA1C|TACC3|MAP4|ASPM|CEP55|CDC20|KIF4A|PRC1|KIF20A|CDK1	4223	272|288|224|208|283|221|320|107|273|367|147|68|336|146		KW-0206	2020
60	18	GO Process	organelle organization	2.15e-05	DLGAP5|KIF11|NDC80|CENPE|CCNA2|SPC25|BUB1B|CCNB2|TUBA1C|TACC3|MAP4|ASPM|CDC20|KIF4A|PRC1|KIF20A|CDK1|TOP2A	4223	272|288|155|224|360|217|208|164|283|221|320|107|367|147|68|336|146|296		GO.0006996	2020
12	10	Reactome Pathways	M Phase	2.21e-05	NDC80|CENPE|SPC25|BUB1B|CCNB2|TUBA1C|ERCC6L|CDC20|KIF20A|CDK1	4223	155|224|217|208|164|283|214|367|336|146		HSA-68886	2020
20	12	GO Process	microtubule cytoskeleton organization	2.34e-05	KIF11|NDC80|CENPE|SPC25|TACC3|MAP4|ASPM|CDC20|KIF4A|PRC1|KIF20A|CDK1	4223	288|155|224|217|221|320|107|367|147|68|336|146		GO.0000226	2020
11	10	GO Process	nuclear division	2.34e-05	DLGAP5|KIF11|NDC80|CENPE|BUB1B|ASPM|CDC20|KIF4A|PRC1|TOP2A	4223	272|288|155|224|208|107|367|147|68|296		GO.0000280	2020
11	10	GO Process	chromosome segregation	2.34e-05	DLGAP5|KIF11|NDC80|CENPE|SPC25|BUB1B|CDC20|KIF4A|PRC1|TOP2A	4223	272|288|155|224|217|208|367|147|68|296		GO.0007059	2020
9	9	GO Process	spindle organization	4.68e-05	KIF11|NDC80|CENPE|SPC25|MAP4|ASPM|CDC20|KIF4A|PRC1	4223	288|155|224|217|320|107|367|147|68		GO.0007051	2020
9	9	GO Process	microtubule cytoskeleton organization involved in mitosis	4.68e-05	KIF11|NDC80|CENPE|SPC25|TACC3|MAP4|CDC20|KIF4A|PRC1	4223	288|155|224|217|221|320|367|147|68		GO.1902850	2020
10	9	Reactome Pathways	Resolution of Sister Chromatid Cohesion	4.96e-05	NDC80|CENPE|SPC25|BUB1B|CCNB2|TUBA1C|ERCC6L|CDC20|CDK1	4223	155|224|217|208|164|283|214|367|146		HSA-2500257	2020
80	19	GO Component	intracellular non-membrane-bounded organelle	5.3e-05	DLGAP5|KIF11|NDC80|CENPE|SPC25|BUB1B|CCNB2|TUBA1C|TACC3|ERCC6L|MAP4|ASPM|CEP55|CDC20|KIF4A|PRC1|KIF20A|CDK1|TOP2A	4223	272|288|155|224|217|208|164|283|221|214|320|107|273|367|147|68|336|146|296		GO.0043232	2020
11	9	Reactome Pathways	Cell Cycle Checkpoints	6.87e-05	NDC80|CENPE|CCNA2|SPC25|BUB1B|CCNB2|ERCC6L|CDC20|CDK1	4223	155|224|360|217|208|164|214|367|146		HSA-69620	2020
20	11	GO Process	regulation of cell cycle process	0.00011	DLGAP5|KIF11|NDC80|CENPE|BUB1B|FANCI|TACC3|CDC20|PRC1|KIF20A|CDK1	4223	272|288|155|224|208|157|221|367|68|336|146		GO.0010564	2020
30	12	UniProt Keywords	Coiled coil	0.00012	DLGAP5|KIF11|NDC80|CENPE|SPC25|TACC3|ASPM|CEP55|KIF4A|PRC1|KIF20A|TBC1D2	4223	272|288|155|224|217|221|107|273|147|68|336|105		KW-0175	2020
8	8	GO Process	sister chromatid segregation	0.00019	DLGAP5|NDC80|CENPE|BUB1B|CDC20|KIF4A|PRC1|TOP2A	4223	272|155|224|208|367|147|68|296		GO.0000819	2020
8	8	GO Process	mitotic spindle organization	0.00019	KIF11|NDC80|CENPE|SPC25|MAP4|CDC20|KIF4A|PRC1	4223	288|155|224|217|320|367|147|68		GO.0007052	2020
10	8	Reactome Pathways	RHO GTPase Effectors	0.00024	NDC80|CENPE|SPC25|BUB1B|TUBA1C|ERCC6L|CDC20|PRC1	4223	155|224|217|208|283|214|367|68		HSA-195258	2020
35	13	GO Process	cytoskeleton organization	0.00025	KIF11|NDC80|CENPE|SPC25|TUBA1C|TACC3|MAP4|ASPM|CDC20|KIF4A|PRC1|KIF20A|CDK1	4223	288|155|224|217|283|221|320|107|367|147|68|336|146		GO.0007010	2020
149	23	UniProt Keywords	Phosphoprotein	0.00039	DLGAP5|KIF11|NDC80|CENPE|CCNA2|SPC25|BUB1B|CCNB2|TUBA1C|FANCI|TACC3|ERCC6L|MAP4|ASPM|CEP55|CDC20|KIF4A|PRC1|KIF20A|CDK1|TOP2A|PBK|TBC1D2	4223	272|288|155|224|360|217|208|164|283|157|221|214|320|107|273|367|147|68|336|146|296|277|105		KW-0597	2020
19	10	GO Process	chromosome organization	0.00041	DLGAP5|NDC80|CENPE|CCNA2|BUB1B|CDC20|KIF4A|PRC1|CDK1|TOP2A	4223	272|155|224|360|208|367|147|68|146|296		GO.0051276	2020
16	9	GO Component	microtubule organizing center	0.00045	DLGAP5|NDC80|BUB1B|CCNB2|TACC3|ASPM|CEP55|CDC20|CDK1	4223	272|155|208|164|221|107|273|367|146		GO.0005815	2020
8	7	Reactome Pathways	Separation of Sister Chromatids	0.00053	NDC80|CENPE|SPC25|BUB1B|TUBA1C|ERCC6L|CDC20	4223	155|224|217|208|283|214|367		HSA-2467813	2020
8	7	Reactome Pathways	RHO GTPases Activate Formins	0.00053	NDC80|CENPE|SPC25|BUB1B|TUBA1C|ERCC6L|CDC20	4223	155|224|217|208|283|214|367		HSA-5663220	2020
17	9	GO Component	microtubule	0.00057	KIF11|CENPE|TUBA1C|MAP4|ASPM|KIF4A|PRC1|KIF20A|CDK1	4223	288|224|283|320|107|147|68|336|146		GO.0005874	2020
7	7	GO Process	mitotic nuclear division	0.00071	DLGAP5|KIF11|NDC80|CENPE|CDC20|KIF4A|PRC1	4223	272|288|155|224|367|147|68		GO.0140014	2020
6	6	Reactome Pathways	Amplification of signal from unattached kinetochores via a MAD2 inhibitory signal	0.00098	NDC80|CENPE|SPC25|BUB1B|ERCC6L|CDC20	4223	155|224|217|208|214|367		HSA-141444	2020
10	7	GO Component	midbody	0.0014	CENPE|ASPM|CEP55|KIF4A|PRC1|KIF20A|CDK1	4223	224|107|273|147|68|336|146		GO.0030496	2020
7	6	Reactome Pathways	MHC class II antigen presentation	0.0014	KIF11|CENPE|TUBA1C|KIF4A|KIF20A|HLA-DOB	4223	288|224|283|147|336|194		HSA-2132295	2020
98	18	UniProt Keywords	Cytoplasm	0.0017	DLGAP5|KIF11|CENPE|CCNA2|BUB1B|TUBA1C|TACC3|CDKN3|MAP4|ASPM|CEP55|CDC20|KIF4A|PRC1|KIF20A|CDK1|TOP2A|TBC1D2	4223	272|288|224|360|208|283|221|218|320|107|273|367|147|68|336|146|296|105		KW-0963	2020
7	6	GO Component	spindle pole	0.0019	DLGAP5|KIF11|TACC3|ASPM|CDC20|PRC1	4223	272|288|221|107|367|68		GO.0000922	2020
11	7	GO Component	centrosome	0.0019	DLGAP5|NDC80|CCNB2|ASPM|CEP55|CDC20|CDK1	4223	272|155|164|107|273|367|146		GO.0005813	2020
7	6	GO Component	mitotic spindle	0.0019	KIF11|CENPE|TACC3|MAP4|ASPM|CDK1	4223	288|224|221|320|107|146		GO.0072686	2020
19	9	GO Process	regulation of mitotic cell cycle	0.0024	DLGAP5|KIF11|NDC80|CENPE|BUB1B|FANCI|TACC3|CDK1|TOP2A	4223	272|288|155|224|208|157|221|146|296		GO.0007346	2020
13	7	UniProt Keywords	Microtubule	0.0026	KIF11|CENPE|TUBA1C|MAP4|KIF4A|PRC1|KIF20A	4223	288|224|283|320|147|68|336		KW-0493	2020
13	7	Reactome Pathways	Adaptive Immune System	0.0026	KIF11|CENPE|TUBA1C|CDC20|KIF4A|KIF20A|HLA-DOB	4223	288|224|283|367|147|336|194		HSA-1280218	2020
9	6	UniProt Keywords	Chromosome	0.0031	NDC80|CENPE|SPC25|BUB1B|ERCC6L|KIF4A	4223	155|224|217|208|214|147		KW-0158	2020
6	6	GO Process	mitotic sister chromatid segregation	0.0031	DLGAP5|NDC80|CENPE|CDC20|KIF4A|PRC1	4223	272|155|224|367|147|68		GO.0000070	2020
10	7	GO Process	regulation of nuclear division	0.0031	DLGAP5|KIF11|NDC80|CENPE|BUB1B|TACC3|CDC20	4223	272|288|155|224|208|221|367		GO.0051783	2020
9	6	Reactome Pathways	Membrane Trafficking	0.0033	KIF11|CENPE|TUBA1C|KIF4A|KIF20A|TBC1D2	4223	288|224|283|147|336|105		HSA-199991	2020
9	6	GO Component	condensed chromosome	0.0038	NDC80|CENPE|SPC25|BUB1B|ERCC6L|TOP2A	4223	155|224|217|208|214|296		GO.0000793	2020
104	18	GO Component	cytosol	0.0038	DLGAP5|KIF11|NDC80|CENPE|CCNA2|SPC25|BUB1B|CCNB2|FANCI|TACC3|ERCC6L|CDKN3|MAP4|CDC20|KIF4A|PRC1|CDK1|TBC1D2	4223	272|288|155|224|360|217|208|164|157|221|214|218|320|367|147|68|146|105		GO.0005829	2020
34	10	UniProt Keywords	Nucleotide-binding	0.0042	KIF11|CENPE|BUB1B|TUBA1C|ERCC6L|KIF4A|KIF20A|CDK1|TOP2A|PBK	4223	288|224|208|283|214|147|336|146|296|277		KW-0547	2020
7	6	GO Process	regulation of mitotic nuclear division	0.005	DLGAP5|KIF11|NDC80|CENPE|BUB1B|TACC3	4223	272|288|155|224|208|221		GO.0007088	2020
6	5	Reactome Pathways	COPI-dependent Golgi-to-ER retrograde traffic	0.005	KIF11|CENPE|TUBA1C|KIF4A|KIF20A	4223	288|224|283|147|336		HSA-6811434	2020
6	5	Reactome Pathways	Kinesins	0.005	KIF11|CENPE|TUBA1C|KIF4A|KIF20A	4223	288|224|283|147|336		HSA-983189	2020
30	9	UniProt Keywords	ATP-binding	0.0071	KIF11|CENPE|BUB1B|ERCC6L|KIF4A|KIF20A|CDK1|TOP2A|PBK	4223	288|224|208|214|147|336|146|296|277		KW-0067	2020
7	5	UniProt Keywords	Centromere	0.0071	NDC80|CENPE|SPC25|BUB1B|ERCC6L	4223	155|224|217|208|214		KW-0137	2020
7	5	UniProt Keywords	Kinetochore	0.0071	NDC80|CENPE|SPC25|BUB1B|ERCC6L	4223	155|224|217|208|214		KW-0995	2020
7	5	GO Component	condensed chromosome kinetochore	0.0098	NDC80|CENPE|SPC25|BUB1B|ERCC6L	4223	155|224|217|208|214		GO.0000777	2020
125	19	GO Component	nucleus	0.0098	DLGAP5|NDC80|CENPE|CCNA2|SPC25|BUB1B|CCNB2|TUBA1C|FANCI|CDKN3|ASPM|CDC20|KIF4A|PRC1|KIF20A|CDK1|TOP2A|PBK|TBC1D2	4223	272|155|224|360|217|208|164|283|157|218|107|367|147|68|336|146|296|277|105		GO.0005634	2020
18	7	GO Component	chromosome	0.0098	NDC80|CENPE|SPC25|BUB1B|ERCC6L|KIF4A|TOP2A	4223	155|224|217|208|214|147|296		GO.0005694	2020
7	5	GO Component	microtubule associated complex	0.0098	KIF11|CENPE|MAP4|KIF4A|KIF20A	4223	288|224|320|147|336		GO.0005875	2020
218	25	GO Component	intracellular organelle	0.0098	DLGAP5|KIF11|NDC80|CENPE|CCNA2|SPC25|BUB1B|CCNB2|TUBA1C|FANCI|TACC3|ERCC6L|CDKN3|MAP4|ASPM|CEP55|CDC20|KIF4A|PRC1|KIF20A|CDK1|HLA-DOB|TOP2A|PBK|TBC1D2	4223	272|288|155|224|360|217|208|164|283|157|221|214|218|320|107|273|367|147|68|336|146|194|296|277|105		GO.0043229	2020
4	4	Reactome Pathways	Cdc20:Phospho-APC/C mediated degradation of Cyclin A	0.0104	CCNA2|BUB1B|CDC20|CDK1	4223	360|208|367|146		HSA-174184	2020
4	4	Reactome Pathways	Regulation of APC/C activators between G1/S and early anaphase	0.0104	CCNA2|BUB1B|CDC20|CDK1	4223	360|208|367|146		HSA-176408	2020
172	22	GO Component	intracellular organelle part	0.011	DLGAP5|KIF11|NDC80|CENPE|CCNA2|SPC25|BUB1B|CCNB2|TUBA1C|FANCI|TACC3|ERCC6L|MAP4|ASPM|CEP55|CDC20|KIF4A|PRC1|KIF20A|CDK1|HLA-DOB|TOP2A	4223	272|288|155|224|360|217|208|164|283|157|221|214|320|107|273|367|147|68|336|146|194|296		GO.0044446	2020
58	12	UniProt Keywords	Ubl conjugation	0.0114	DLGAP5|KIF11|CENPE|CCNA2|BUB1B|FANCI|MAP4|CDC20|KIF4A|CDK1|TOP2A|PBK	4223	272|288|224|360|208|157|320|367|147|146|296|277		KW-0832	2020
9	6	GO Process	microtubule-based movement	0.0124	DLGAP5|KIF11|CENPE|MAP4|KIF4A|KIF20A	4223	272|288|224|320|147|336		GO.0007018	2020
5	5	GO Process	regulation of mitotic sister chromatid separation	0.0124	DLGAP5|NDC80|CENPE|BUB1B|TACC3	4223	272|155|224|208|221		GO.0010965	2020
9	6	GO Process	mitotic cell cycle phase transition	0.0124	CCNA2|BUB1B|CCNB2|TACC3|CDKN3|CDK1	4223	360|208|164|221|218|146		GO.0044772	2020
9	6	GO Process	regulation of mitotic cell cycle phase transition	0.0124	DLGAP5|NDC80|CENPE|BUB1B|FANCI|CDK1	4223	272|155|224|208|157|146		GO.1901990	2020
5	4	GO Component	kinesin complex	0.0138	KIF11|CENPE|KIF4A|KIF20A	4223	288|224|147|336		GO.0005871	2020
35	10	GO Process	regulation of organelle organization	0.0169	DLGAP5|KIF11|NDC80|CENPE|BUB1B|TACC3|MAP4|CDC20|TOP2A|TBC1D2	4223	272|288|155|224|208|221|320|367|296|105		GO.0033043	2020
11	6	GO Process	organelle localization	0.0193	DLGAP5|NDC80|CENPE|MAP4|ASPM|CDK1	4223	272|155|224|320|107|146		GO.0051640	2020
11	6	GO Process	organelle assembly	0.0193	KIF11|CENPE|ASPM|CDC20|KIF4A|CDK1	4223	288|224|107|367|147|146		GO.0070925	2020
93	15	GO Component	protein-containing complex	0.0201	KIF11|NDC80|CENPE|CCNA2|SPC25|BUB1B|ERCC6L|MAP4|CDC20|KIF4A|KIF20A|CDK1|HLA-DOB|CCBE1|TOP2A	4223	288|155|224|360|217|208|214|320|367|147|336|146|194|355|296		GO.0032991	2020
6	4	GO Component	spindle microtubule	0.0204	CENPE|KIF4A|PRC1|CDK1	4223	224|147|68|146		GO.0005876	2020
6	4	UniProt Keywords	Motor protein	0.0222	KIF11|CENPE|KIF4A|KIF20A	4223	288|224|147|336		KW-0505	2020
3	3	GO Component	intercellular bridge	0.0327	CEP55|KIF4A|KIF20A	4223	273|147|336		GO.0045171	2020
7	4	Reactome Pathways	G2/M Transition	0.0327	CCNA2|CCNB2|TUBA1C|CDK1	4223	360|164|283|146		HSA-69275	2020
4	4	SMART Domains	Kinesin motor, catalytic domain. ATPase.	0.0336	KIF11|CENPE|KIF4A|KIF20A	4223	288|224|147|336		SM00129	2020
3	3	Reactome Pathways	Cyclin A/B1/B2 associated events during G2/M transition	0.0341	CCNA2|CCNB2|CDK1	4223	360|164|146		HSA-69273	2020
4	4	GO Process	antigen processing and presentation of exogenous peptide antigen via MHC class II	0.0353	KIF11|CENPE|KIF4A|HLA-DOB	4223	288|224|147|194		GO.0019886	2020
4	4	GO Process	regulation of mitotic metaphase/anaphase transition	0.0353	DLGAP5|NDC80|CENPE|BUB1B	4223	272|155|224|208		GO.0030071	2020
4	4	GO Process	spindle assembly	0.0353	KIF11|ASPM|CDC20|KIF4A	4223	288|107|367|147		GO.0051225	2020
40	10	GO Process	cellular localization	0.0353	DLGAP5|NDC80|CENPE|BUB1B|TUBA1C|MAP4|ASPM|KIF4A|CDK1|TBC1D2	4223	272|155|224|208|283|320|107|147|146|105		GO.0051641	2020
219	24	GO Component	cytoplasm	0.036	DLGAP5|KIF11|NDC80|CENPE|CCNA2|SPC25|BUB1B|CCNB2|TUBA1C|FANCI|TACC3|ERCC6L|CDKN3|MAP4|ASPM|CEP55|CDC20|KIF4A|PRC1|KIF20A|CDK1|HLA-DOB|TOP2A|TBC1D2	4223	272|288|155|224|360|217|208|164|283|157|221|214|218|320|107|273|367|147|68|336|146|194|296|105		GO.0005737	2020
14	6	GO Process	regulation of chromosome organization	0.0371	DLGAP5|NDC80|CENPE|BUB1B|TACC3|TOP2A	4223	272|155|224|208|221|296		GO.0033044	2020
61	11	Reactome Pathways	Signal Transduction	0.0446	DLGAP5|NDC80|CENPE|SPC25|BUB1B|TUBA1C|TACC3|ERCC6L|CDC20|PRC1|CDK1	4223	272|155|224|217|208|283|221|214|367|68|146		HSA-162582	2020
5	4	GO Process	mitotic cell cycle checkpoint	0.0466	BUB1B|FANCI|CDK1|TOP2A	4223	208|157|146|296		GO.0007093	2020

## Sheet: Cluster 3
# background genes	# genes	category	description	FDR value	genes	network.SUID	nodes.SUID	PMID	term name	year
6	3	KEGG Pathways	Rap1 signaling pathway	0.0496	MET|KRIT1|VEGFA	4504	99|79|225		map04015	2020
6	3	KEGG Pathways	Malaria	0.0496	COMP|TGFB3|MET	4504	201|156|99		map05144	2020
5	3	KEGG Pathways	MicroRNAs in cancer	0.0496	MET|VIM|VEGFA	4504	99|63|225		map05206	2020
4	3	KEGG Pathways	Renal cell carcinoma	0.0496	TGFB3|MET|VEGFA	4504	156|99|225		map05211	2020
