# Supplementary material for: Determining the Molecular Background of Endometrial Receptivity in Adenomyosis
Source: Biomolecules. 2020 Sep 11;10(9):1311. doi: 10.3390/biom10091311 (PMC7563201; doi:10.3390/biom10091311)
Supplement: Supplementary file 1 [file biomolecules-10-01311-s001.zip › Supplementary Figure S2_GSEA for overlapping pathways.xlsx]

## Sheet: Endometriosis
Pathway identifier	Pathway name	#Entities found	#Entities total	Entities ratio	Entities pValue	Entities FDR	#Reactions found	#Reactions total	Reactions ratio	Species identifier	Species name	Submitted entities found	Mapped entities	Found reaction identifiers
R-HSA-9031628	NGF-stimulated transcription	10	56	0.00385834	9.95025e-08	7.70149e-05	27	36	0.00283465	9606	Homo sapiens	EGR1;EGR2;EGR3;FOSB;FOS;JUNB;CDK5R1		R-HSA-9613202;R-HSA-9031624;R-HSA-9613207;R-HSA-9613210;R-HSA-9031616;R-HSA-9613213;R-HSA-9612483;R-HSA-9621386;R-HSA-9621385;R-HSA-9612493;R-HSA-9621042;R-HSA-9620723;R-HSA-9616368;R-HSA-9612534;R-HSA-9620663;R-HSA-9621048;R-HSA-9612514;R-HSA-9613219;R-HSA-9612516;R-HSA-9613476;R-HSA-9621035;R-HSA-9621032;R-HSA-9612073;R-HSA-9616105;R-HSA-9616110;R-HSA-9616367;R-HSA-9612076
R-HSA-6783783	Interleukin-10 signaling	11	86	0.00592531	6.08484e-07	0.000235483	2	15	0.0011811	9606	Homo sapiens	IL6;CCL3L1;CCL3L3;PTAFR;CCL3;CXCL2		R-HSA-6784160;R-HSA-8937654
R-HSA-449147	Signaling by Interleukins	30	639	0.0440265	1.82595e-06	0.000467817	36	490	0.0385827	9606	Homo sapiens	YWHAE;CCL3L1;ANXA2;CCL3L3;PTAFR;FOS;CXCL2;VEGFA;HSP90B1;SOCS3;MAPK8;IL6;CA1;LCK;CCL3;VIM;JUNB;ATF3		R-HSA-452100;R-HSA-1067667;R-HSA-6784160;R-HSA-1112727;R-HSA-6789615;R-HSA-1112602;R-HSA-168136;R-HSA-1112604;R-HSA-1067676;R-HSA-1112514;R-HSA-450325;R-HSA-1067651;R-HSA-912734;R-HSA-1112708;R-HSA-9005340;R-HSA-8950623;R-HSA-8950480;R-HSA-1067659;R-HSA-912790;R-HSA-168162;R-HSA-1112690;R-HSA-9008043;R-HSA-1112755;R-HSA-1112565;R-HSA-1067640;R-HSA-450348;R-HSA-1112510;R-HSA-1112703;R-HSA-6790038;…
R-HSA-198725	Nuclear Events (kinase and transcription factor activation)	10	80	0.00551192	2.42392e-06	0.000467817	27	47	0.00370079	9606	Homo sapiens	EGR1;EGR2;EGR3;FOSB;FOS;JUNB;CDK5R1		R-HSA-9613202;R-HSA-9031624;R-HSA-9613207;R-HSA-9613210;R-HSA-9031616;R-HSA-9613213;R-HSA-9612483;R-HSA-9621386;R-HSA-9621385;R-HSA-9612493;R-HSA-9621042;R-HSA-9620723;R-HSA-9616368;R-HSA-9612534;R-HSA-9620663;R-HSA-9621048;R-HSA-9612514;R-HSA-9613219;R-HSA-9612516;R-HSA-9613476;R-HSA-9621035;R-HSA-9621032;R-HSA-9612073;R-HSA-9616105;R-HSA-9616110;R-HSA-9616367;R-HSA-9612076
R-HSA-166520	Signaling by NTRKs	13	166	0.0114372	1.2287e-05	0.0018922	56	163	0.0128346	9606	Homo sapiens	YWHAE;ABCC3;EGR1;EGR2;EGR3;FOSB;FOS;JUNB;PCSK5;CDK5R1		R-HSA-9032073;R-HSA-9032841;R-HSA-9613202;R-HSA-9613207;R-HSA-9613210;R-HSA-9032067;R-HSA-187020;R-HSA-9613213;R-HSA-9028505;R-HSA-9032863;R-HSA-9621386;R-HSA-9026579;R-HSA-9621385;R-HSA-9032854;R-HSA-9621042;R-HSA-169891;R-HSA-9031981;R-HSA-9620663;R-HSA-169895;R-HSA-9612980;R-HSA-9621048;R-HSA-9028519;R-HSA-169901;R-HSA-9613219;R-HSA-169904;R-HSA-169905;R-HSA-9026493;R-HSA-9613476;R-HSA-9621035…
R-HSA-187037	Signaling by NTRK1 (TRKA)	11	143	0.00985256	6.71395e-05	0.008661	33	101	0.00795276	9606	Homo sapiens	YWHAE;EGR1;EGR2;EGR3;FOSB;FOS;JUNB;CDK5R1		R-HSA-9613202;R-HSA-9031624;R-HSA-9613207;R-HSA-9613210;R-HSA-9031616;R-HSA-9613213;R-HSA-9612483;R-HSA-9621386;R-HSA-9621385;R-HSA-9612493;R-HSA-9621042;R-HSA-9620723;R-HSA-169891;R-HSA-9616368;R-HSA-9612534;R-HSA-9620663;R-HSA-169895;R-HSA-9612980;R-HSA-9621048;R-HSA-169901;R-HSA-9612514;R-HSA-9613219;R-HSA-169904;R-HSA-169905;R-HSA-9612516;R-HSA-9613476;R-HSA-9621035;R-HSA-9621032;R-HSA-961207…
R-HSA-6785807	Interleukin-4 and Interleukin-13 signaling	13	211	0.0145377	0.000137078	0.0150785	5	46	0.00362205	9606	Homo sapiens	SOCS3;IL6;VIM;FOS;JUNB;VEGFA;HSP90B1		R-HSA-6790038;R-HSA-6790036;R-HSA-6789524;R-HSA-6789615;R-HSA-6790041
R-HSA-1280215	Cytokine Signaling in Immune system	39	1261	0.0868816	0.000597261	0.0573371	74	699	0.0550394	9606	Homo sapiens	EIF4A2;YWHAE;EIF4A1;CCL3L1;CCL3L3;PTAFR;CXCL2;HSP90B1;SOCS3;MAPK8;CA1;CCL3;JUNB;IFNA21;EGR1;ANXA2;PRRC2C;FOS;VEGFA;BST2;IL6;LCK;VIM;MET;ATF3		R-HSA-452100;R-HSA-1067667;R-HSA-1168789;R-HSA-982792;R-HSA-1112727;R-HSA-6789615;R-HSA-1112602;R-HSA-1112604;R-HSA-1067676;R-HSA-909724;R-HSA-1168768;R-HSA-450325;R-HSA-909726;R-HSA-1067651;R-HSA-1112708;R-HSA-982810;R-HSA-909720;R-HSA-9005340;R-HSA-909722;R-HSA-1168777;R-HSA-1015702;R-HSA-982807;R-HSA-909719;R-HSA-909718;R-HSA-1067659;R-HSA-912790;R-HSA-1015699;R-HSA-1362485;R-HSA-9008043;R-HSA…
R-HSA-446107	Type I hemidesmosome assembly	3	11	0.000757889	0.00108995	0.0937361	4	6	0.000472441	9606	Homo sapiens	DST;LAMA3;KRT5		R-HSA-446083;R-HSA-432956;R-HSA-446077;R-HSA-446089
R-HSA-189085	Digestion of dietary carbohydrate	4	26	0.00179137	0.00133095	0.102483	2	13	0.00102362	9606	Homo sapiens	AMY2A;AMY2B;AMY1A		R-HSA-188979;R-HSA-191114
R-HSA-380994	ATF4 activates genes in response to endoplasmic reticulum stress	4	34	0.00234257	0.00348325	0.243827	2	7	0.000551181	9606	Homo sapiens	CELF1;ANXA5;ATF3		R-HSA-517731;R-HSA-1791173
R-HSA-380108	Chemokine receptors bind chemokines	5	57	0.00392724	0.00389828	0.24949	2	19	0.00149606	9606	Homo sapiens	CCL8;CCL3L1;CCL3L3;CCL3;CXCL2		R-HSA-373813;R-HSA-443986
R-HSA-450513	Tristetraprolin (TTP, ZFP36) binds and destabilizes mRNA	3	19	0.00130908	0.00505756	0.265573	4	4	0.000314961	9606	Homo sapiens	ZFP36;CELF1;ANXA5		R-HSA-450400;R-HSA-450431;R-HSA-450463;R-HSA-450394
R-HSA-375276	Peptide ligand-binding receptors	10	211	0.0145377	0.00522524	0.265573	8	76	0.00598425	9606	Homo sapiens	EDNRB;CCL8;CCL3L1;CCL3L3;PLEK;CCL3;PDHB;ACKR1;CXCL2;AGT		R-HSA-373813;R-HSA-443986;R-HSA-388560;R-HSA-444691;R-HSA-9615348;R-HSA-374173;R-HSA-380076;R-HSA-374251
R-HSA-9668328	Sealing of the nuclear envelope (NE) by ESCRT-III	4	39	0.00268706	0.00562757	0.265573	6	7	0.000551181	9606	Homo sapiens	TUBA1C;YBX1;ACO2		R-HSA-9668419;R-HSA-9668389;R-HSA-9668405;R-HSA-9668395;R-HSA-9668415;R-HSA-9668398
R-HSA-1362300	Transcription of E2F targets under negative control by p107 (RBL1) and p130 (RBL2) in complex with HDAC1	3	20	0.00137798	0.00582236	0.265573	3	8	0.000629921	9606	Homo sapiens	RBBP4;CCN1		R-HSA-8964588;R-HSA-8964513;R-HSA-8964580
R-HSA-8935690	Digestion	5	63	0.00434064	0.00590162	0.265573	3	24	0.00188976	9606	Homo sapiens	AMY2A;AMY2B;AMY1A;ALPI		R-HSA-188979;R-HSA-8878787;R-HSA-191114
R-HSA-8849474	PTK6 Activates STAT3	2	7	0.000482293	0.0072114	0.281387	3	9	0.000708661	9606	Homo sapiens	SOCS3		R-HSA-8848150;R-HSA-8848178;R-HSA-8848110
R-HSA-381042	PERK regulates gene expression	4	42	0.00289376	0.00726274	0.281387	2	11	0.000866142	9606	Homo sapiens	CELF1;ANXA5;ATF3		R-HSA-517731;R-HSA-1791173
R-HSA-381119	Unfolded Protein Response (UPR)	8	155	0.0106793	0.00740492	0.281387	4	94	0.00740157	9606	Homo sapiens	DNAJC3;CELF1;ANXA5;ATF3;HSP90B1		R-HSA-1791163;R-HSA-517731;R-HSA-1791173;R-HSA-1791157
R-HSA-9006934	Signaling by Receptor Tyrosine Kinases	20	622	0.0428552	0.0090207	0.306358	169	698	0.0549606	9606	Homo sapiens	YWHAE;ABCC3;EGR1;EGR2;EGR3;LAMA3;FOS;SHB;PCSK5;VEGFA;LCK;FOSB;JUNB;MET;CDK5R1		R-HSA-9032073;R-HSA-9032841;R-HSA-9613202;R-HSA-205319;R-HSA-194310;R-HSA-9613207;R-HSA-8851842;R-HSA-194311;R-HSA-1562641;R-HSA-9613210;R-HSA-9032067;R-HSA-8875661;R-HSA-8875659;R-HSA-9613213;R-HSA-9028505;R-HSA-8851859;R-HSA-9032863;R-HSA-9621386;R-HSA-5218645;R-HSA-9621385;R-HSA-5218643;R-HSA-8851866;R-HSA-5218642;R-HSA-9032854;R-HSA-5218640;R-HSA-8875431;R-HSA-8851877;R-HSA-5357429;R-HSA-9620…
R-HSA-194313	VEGF ligand-receptor interactions	2	8	0.000551192	0.00930921	0.306358	3	4	0.000314961	9606	Homo sapiens	VEGFA		R-HSA-195378;R-HSA-194310;R-HSA-194311
R-HSA-195399	VEGF binds to VEGFR leading to receptor dimerization	2	8	0.000551192	0.00930921	0.306358	2	3	0.00023622	9606	Homo sapiens	VEGFA		R-HSA-194310;R-HSA-194311
R-HSA-8963743	Digestion and absorption	5	71	0.00489183	0.0095737	0.306358	3	30	0.0023622	9606	Homo sapiens	AMY2A;AMY2B;AMY1A;ALPI		R-HSA-188979;R-HSA-8878787;R-HSA-191114
R-HSA-427975	Proton/oligopeptide cotransporters	2	9	0.000620091	0.0116449	0.337701	1	2	0.00015748	9606	Homo sapiens	SLC15A4		R-HSA-428007
R-HSA-391906	Leukotriene receptors	2	9	0.000620091	0.0116449	0.337701	1	3	0.00023622	9606	Homo sapiens	LTB4R2		R-HSA-391941
R-HSA-6798695	Neutrophil degranulation	16	480	0.0330715	0.0136932	0.359815	9	10	0.000787402	9606	Homo sapiens	CDA;AOC1;GSN;ANXA2;SLC44A2;CRISP3;PTAFR;CXCL2;PRDX6;DNAJC3;BST2;CCT8;SLC15A4;SCG2;KCNK2;S100A8		R-HSA-6798743;R-HSA-6799350;R-HSA-6798739;R-HSA-6800434;R-HSA-6798751;R-HSA-6798749;R-HSA-6798748;R-HSA-6798747;R-HSA-6798745
R-HSA-416476	G alpha (q) signalling events	11	283	0.0194984	0.0140738	0.359815	9	35	0.00275591	9606	Homo sapiens	EIF4A1;EDNRB;LTB4R2;RGS1;PLEK;PTAFR;PDHB;AGT		R-HSA-8982025;R-HSA-418582;R-HSA-114688;R-HSA-749448;R-HSA-8982026;R-HSA-749452;R-HSA-8982017;R-HSA-398188;R-HSA-379048
R-HSA-8957275	Post-translational protein phosphorylation	6	109	0.00750999	0.0145295	0.359815	1	1	7.87402e-05	9606	Homo sapiens	DNAJC3;IL6;CCN1;SCG2;PCYOX1;HSP90B1		R-HSA-8952289
R-HSA-8875656	MET receptor recycling	2	11	0.000757889	0.0169938	0.359815	2	2	0.00015748	9606	Homo sapiens	YWHAE;MET		R-HSA-8875661;R-HSA-8875659
R-HSA-8939242	RUNX1 regulates transcription of genes involved in differentiation of keratinocytes	2	11	0.000757889	0.0169938	0.359815	2	8	0.000629921	9606	Homo sapiens	SOCS3		R-HSA-8955885;R-HSA-8955748
R-HSA-389960	Formation of tubulin folding intermediates by CCT/TriC	3	30	0.00206697	0.0172563	0.359815	2	2	0.00015748	9606	Homo sapiens	TUBA1C;CCT8		R-HSA-389954;R-HSA-389961
R-HSA-450341	Activation of the AP-1 family of transcription factors	2	12	0.000826788	0.0199897	0.359815	4	5	0.000393701	9606	Homo sapiens	MAPK8;FOS;ATF3		R-HSA-450292;R-HSA-450325;R-HSA-168053;R-HSA-168136
R-HSA-264870	Caspase-mediated cleavage of cytoskeletal proteins	2	12	0.000826788	0.0199897	0.359815	4	10	0.000787402	9606	Homo sapiens	GSN;VIM		R-HSA-201622;R-HSA-350319;R-HSA-350318;R-HSA-201628
R-HSA-8875555	MET activates RAP1 and RAC1	2	13	0.000895687	0.0231888	0.394209	5	5	0.000393701	9606	Homo sapiens	YWHAE;MET		R-HSA-8875591;R-HSA-8875558;R-HSA-8875540;R-HSA-8875568;R-HSA-8875576
R-HSA-168256	Immune System	64	2823	0.194502	0.0237245	0.403317	156	1598	0.125827	9606	Homo sapiens	YWHAE;EIF4A2;CDA;C1QA;EIF4A1;CCL3L1;SLC44A2;CRISP3;CCL3L3;PTAFR;CXCL2;AFF4;HSP90B1;SOCS3;TUBA1C;MAPK8;CA1;CCL3;MUC7;CCT8;VHL;ENPP3;SLC15A4;JUNB;IFNA21;EGR1;AOC1;GSN;ANXA2;PRRC2C;FOS;PRDX6;VEGFA;BST2;DNAJC3;NCR1;IL6;LCK;VIM;KCNK2;SCG2;MET;ATF3;S100A8		R-HSA-389381;R-HSA-9604499;R-HSA-452100;R-HSA-8858500;R-HSA-202245;R-HSA-982792;R-HSA-1112602;R-HSA-2130731;R-HSA-2395439;R-HSA-202248;R-HSA-1112604;R-HSA-450325;R-HSA-982810;R-HSA-982807;R-HSA-879377;R-HSA-1362485;R-HSA-9008043;R-HSA-389158;R-HSA-912680;R-HSA-450348;R-HSA-1031716;R-HSA-1031713;R-HSA-2395412;R-HSA-202291;R-HSA-1362465;R-HSA-5685600;R-HSA-1168423;R-HSA-173626;R-HSA-173631;R-HSA-89…
R-HSA-9615710	Late endosomal microautophagy	3	35	0.00241146	0.0256904	0.411046	3	3	0.00023622	9606	Homo sapiens	YBX1;VIM;ACO2		R-HSA-9631065;R-HSA-9615721;R-HSA-9631068
R-HSA-75205	Dissolution of Fibrin Clot	2	14	0.000964586	0.0265829	0.42045	2	19	0.00149606	9606	Homo sapiens	ANXA2;SERPINB8		R-HSA-159001;R-HSA-158750
R-HSA-5626467	RHO GTPases activate IQGAPs	3	36	0.00248036	0.0275986	0.42045	2	5	0.000393701	9606	Homo sapiens	TUBA1C;SCG2		R-HSA-5672304;R-HSA-5672329
R-HSA-381426	Regulation of Insulin-like Growth Factor (IGF) transport and uptake by Insulin-like Growth Factor Binding Proteins (IGFBPs)	6	127	0.00875017	0.02803	0.42045	1	14	0.00110236	9606	Homo sapiens	DNAJC3;IL6;CCN1;SCG2;PCYOX1;HSP90B1		R-HSA-8952289
R-HSA-2559583	Cellular Senescence	8	199	0.0137109	0.0283513	0.422297	25	90	0.00708661	9606	Homo sapiens	MAPK8;HOXA9;IL6;RBBP4;PAX8;FOS;CCN1;ATF3		R-HSA-168136;R-HSA-3790130;R-HSA-3240957;R-HSA-3209151;R-HSA-3229089;R-HSA-3223200;R-HSA-450325;R-HSA-3240295;R-HSA-3788705;R-HSA-187934;R-HSA-3788708;R-HSA-3229102;R-HSA-168162;R-HSA-4568740;R-HSA-3222546;R-HSA-3857305;R-HSA-4568737;R-HSA-3209111;R-HSA-3209114;R-HSA-450348;R-HSA-3797202;R-HSA-450292;R-HSA-3222533;R-HSA-3797196;R-HSA-3788748
R-HSA-389958	Cooperation of Prefoldin and TriC/CCT in actin and tubulin folding	3	37	0.00254926	0.0295803	0.422297	6	6	0.000472441	9606	Homo sapiens	TUBA1C;CCT8		R-HSA-390453;R-HSA-389970;R-HSA-389954;R-HSA-389980;R-HSA-389961;R-HSA-390459
R-HSA-381183	ATF6 (ATF6-alpha) activates chaperone genes	2	15	0.00103348	0.0301641	0.422297	1	5	0.000393701	9606	Homo sapiens	HSP90B1		R-HSA-1791163
R-HSA-1234158	Regulation of gene expression by Hypoxia-inducible Factor	2	15	0.00103348	0.0301641	0.422297	1	7	0.000551181	9606	Homo sapiens	VEGFA		R-HSA-1235037
R-HSA-429914	Deadenylation-dependent mRNA decay	4	65	0.00447843	0.0304245	0.425943	5	10	0.000787402	9606	Homo sapiens	EIF4A2;EIF4A1;CELF1;ANXA5		R-HSA-430021;R-HSA-429955;R-HSA-8941312;R-HSA-430028;R-HSA-429992
R-HSA-1538133	G0 and Early G1	3	38	0.00261816	0.0316353	0.438922	20	27	0.00212598	9606	Homo sapiens	RBBP4;CCN1		R-HSA-1362261;R-HSA-8964588;R-HSA-8964492;R-HSA-8964525;R-HSA-1363314;R-HSA-8964513;R-HSA-8961665;R-HSA-1362270;R-HSA-8964482;R-HSA-8964580;R-HSA-1363303;R-HSA-8964475;R-HSA-8964465;R-HSA-8964498;R-HSA-1363311;R-HSA-8964531;R-HSA-8961619;R-HSA-188345;R-HSA-1363306;R-HSA-8964471
R-HSA-2173796	SMAD2/SMAD3:SMAD4 heterotrimer regulates transcription	3	39	0.00268706	0.0337633	0.438922	2	17	0.00133858	9606	Homo sapiens	JUNB;SCG2		R-HSA-2186643;R-HSA-2187293
R-HSA-390522	Striated Muscle Contraction	3	40	0.00275596	0.0359638	0.450242	4	4	0.000314961	9606	Homo sapiens	RIF1;VIM;SCG2		R-HSA-390597;R-HSA-390598;R-HSA-390593;R-HSA-390595
R-HSA-1059683	Interleukin-6 signaling	2	17	0.00117128	0.0378576	0.450242	16	19	0.00149606	9606	Homo sapiens	SOCS3;IL6		R-HSA-1112690;R-HSA-1112755;R-HSA-1067667;R-HSA-1112565;R-HSA-1112727;R-HSA-1067640;R-HSA-1112602;R-HSA-1112604;R-HSA-1067676;R-HSA-1112510;R-HSA-1112703;R-HSA-1112514;R-HSA-1067651;R-HSA-1112708;R-HSA-1067688;R-HSA-1067659
R-HSA-1475029	Reversible hydration of carbon dioxide	2	17	0.00117128	0.0378576	0.450242	4	8	0.000629921	9606	Homo sapiens	CA12;CA1		R-HSA-1475026;R-HSA-1475025;R-HSA-1475022;R-HSA-1475017
R-HSA-381033	ATF6 (ATF6-alpha) activates chaperones	2	17	0.00117128	0.0378576	0.450242	1	10	0.000787402	9606	Homo sapiens	HSP90B1		R-HSA-1791163
R-HSA-114608	Platelet degranulation	6	137	0.00943916	0.038262	0.450242	3	11	0.000866142	9606	Homo sapiens	TGFB3;PLEK;ANXA5;CTSW;VEGFA		R-HSA-482772;R-HSA-481009;R-HSA-481007
R-HSA-8950505	Gene and protein expression by JAK-STAT signaling after Interleukin-12 stimulation	4	73	0.00502963	0.0434379	0.450242	2	36	0.00283465	9606	Homo sapiens	CA1;ANXA2		R-HSA-8950623;R-HSA-8950480
R-HSA-450385	Butyrate Response Factor 1 (BRF1) binds and destabilizes mRNA	2	19	0.00130908	0.0462104	0.450242	1	6	0.000472441	9606	Homo sapiens	CELF1;ANXA5		R-HSA-450488
R-HSA-76005	Response to elevated platelet cytosolic Ca2+	6	144	0.00992146	0.0466798	0.450242	3	14	0.00110236	9606	Homo sapiens	TGFB3;PLEK;ANXA5;CTSW;VEGFA		R-HSA-482772;R-HSA-481009;R-HSA-481007
R-HSA-8875878	MET promotes cell motility	3	45	0.00310045	0.0480371	0.450242	12	12	0.000944882	9606	Homo sapiens	YWHAE;LAMA3;MET		R-HSA-8875591;R-HSA-8875558;R-HSA-8875540;R-HSA-8874083;R-HSA-8875523;R-HSA-8874082;R-HSA-8875568;R-HSA-8874080;R-HSA-8874079;R-HSA-8874078;R-HSA-8875531;R-HSA-8875576

## Sheet: Adenomyosis
Pathway identifier	Pathway name	#Entities found	#Entities total	Entities ratio	Entities pValue	Entities FDR	#Reactions found	#Reactions total	Reactions ratio	Species identifier	Species name	Submitted entities found	Mapped entities	Found reaction identifiers
R-HSA-6783589	Interleukin-6 family signaling	3	30	0.00206697	0.000350464	0.0538081	12	33	0.00259843	9606	Homo sapiens	STAT3;LIF;LIFR		R-HSA-6783524;R-HSA-6783556;R-HSA-5696482;R-HSA-1112565;R-HSA-6783681;R-HSA-6783552;R-HSA-1112727;R-HSA-6784189;R-HSA-1112602;R-HSA-1112538;R-HSA-1112587;R-HSA-1112604
R-HSA-8939247	RUNX1 regulates transcription of genes involved in interleukin signaling	2	7	0.000482293	0.00047413	0.0538081	2	5	0.000393701	9606	Homo sapiens	LIFR		R-HSA-8934688;R-HSA-8934690
R-HSA-1474228	Degradation of the extracellular matrix	5	148	0.0101971	0.000547826	0.0538081	11	105	0.00826772	9606	Homo sapiens	COL11A1;SPP1;COL8A1;MMP20		R-HSA-2482180;R-HSA-1454757;R-HSA-4086205;R-HSA-1564179;R-HSA-1566979;R-HSA-1605825;R-HSA-2168923;R-HSA-1602466;R-HSA-1454781;R-HSA-2537499;R-HSA-1564169
R-HSA-6783783	Interleukin-10 signaling	4	86	0.00592531	0.000625675	0.0538081	15	15	0.0011811	9606	Homo sapiens	IL10;STAT3;LIF		R-HSA-6784006;R-HSA-6784324;R-HSA-6784323;R-HSA-6784160;R-HSA-6790029;R-HSA-449803;R-HSA-6785047;R-HSA-8937656;R-HSA-6784791;R-HSA-449811;R-HSA-6784319;R-HSA-449855;R-HSA-6784765;R-HSA-6784763;R-HSA-8937654
R-HSA-8949275	RUNX3 Regulates Immune Response and Cell Migration	2	10	0.00068899	0.000959271	0.0661897	1	5	0.000393701	9606	Homo sapiens	SPP1		R-HSA-8952442
R-HSA-9022702	MECP2 regulates transcription of neuronal ligands	2	13	0.000895687	0.0016072	0.086068	2	8	0.000629921	9606	Homo sapiens	SST		R-HSA-9021935;R-HSA-9021919
R-HSA-68952	DNA replication initiation	2	16	0.00110238	0.00241363	0.086068	2	2	0.00015748	9606	Homo sapiens	ITGB3;LIFR		R-HSA-68913;R-HSA-68950
R-HSA-6785807	Interleukin-4 and Interleukin-13 signaling	5	211	0.0145377	0.00260198	0.086068	19	46	0.00362205	9606	Homo sapiens	IL10;STAT3;LIF		R-HSA-6788582;R-HSA-6790022;R-HSA-6789615;R-HSA-6786095;R-HSA-6788623;R-HSA-6788622;R-HSA-6790029;R-HSA-6786124;R-HSA-6790025;R-HSA-6789960;R-HSA-6790038;R-HSA-6786293;R-HSA-6790036;R-HSA-6788628;R-HSA-6786097;R-HSA-6797245;R-HSA-6788571;R-HSA-6790041;R-HSA-6786072
R-HSA-6788467	IL-6-type cytokine receptor ligand interactions	2	17	0.00117128	0.00271693	0.086068	6	14	0.00110236	9606	Homo sapiens	LIF;LIFR		R-HSA-6783524;R-HSA-6783556;R-HSA-5696482;R-HSA-6783681;R-HSA-6783552;R-HSA-6784189
R-HSA-1483166	Synthesis of PA	3	65	0.00447843	0.00318933	0.086068	2	17	0.00133858	9606	Homo sapiens	LIPH		R-HSA-1483182;R-HSA-6792445
R-HSA-2022090	Assembly of collagen fibrils and other multimeric structures	3	67	0.00461623	0.00347082	0.086068	5	26	0.00204724	9606	Homo sapiens	COL11A1;COL8A1;MMP20		R-HSA-2213201;R-HSA-2213200;R-HSA-2213207;R-HSA-2299620;R-HSA-1474266
R-HSA-1474244	Extracellular matrix organization	6	329	0.0226678	0.00357435	0.086068	69	318	0.0250394	9606	Homo sapiens	COL11A1;ITGB3;SPP1;COL8A1;MMP20		R-HSA-8948232;R-HSA-114560;R-HSA-8944266;R-HSA-8948234;R-HSA-2002460;R-HSA-210304;R-HSA-4086205;R-HSA-1564179;R-HSA-4086200;R-HSA-8948224;R-HSA-8948226;R-HSA-216072;R-HSA-8948228;R-HSA-8948230;R-HSA-8948231;R-HSA-216076;R-HSA-1566979;R-HSA-2002440;R-HSA-2327738;R-HSA-2395320;R-HSA-349593;R-HSA-1564169;R-HSA-2482180;R-HSA-4088218;R-HSA-349603;R-HSA-2022073;R-HSA-1454781;R-HSA-2327695;R-HSA-1981104…
R-HSA-1442490	Collagen degradation	3	69	0.00475403	0.00376706	0.086068	6	34	0.00267717	9606	Homo sapiens	COL11A1;COL8A1;MMP20		R-HSA-2482180;R-HSA-1454757;R-HSA-1564179;R-HSA-2168923;R-HSA-2537499;R-HSA-1564169
R-HSA-936837	Ion transport by P-type ATPases	3	71	0.00489183	0.00407831	0.086068	2	14	0.00110236	9606	Homo sapiens	ATP1A2;ATP12A		R-HSA-937311;R-HSA-936897
R-HSA-2892247	POU5F1 (OCT4), SOX2, NANOG activate genes related to proliferation	2	21	0.00144688	0.00409848	0.086068	2	16	0.00125984	9606	Homo sapiens	STAT3		R-HSA-2972956;R-HSA-452515
R-HSA-216083	Integrin cell surface interactions	3	86	0.00592531	0.00691198	0.13824	22	54	0.00425197	9606	Homo sapiens	ITGB3;SPP1;COL8A1		R-HSA-114560;R-HSA-4085087;R-HSA-210304;R-HSA-4088218;R-HSA-4085083;R-HSA-349603;R-HSA-216072;R-HSA-265423;R-HSA-2327695;R-HSA-216076;R-HSA-216050;R-HSA-2752125;R-HSA-265424;R-HSA-265425;R-HSA-4088264;R-HSA-2426259;R-HSA-265426;R-HSA-265427;R-HSA-2752115;R-HSA-349593;R-HSA-216061;R-HSA-2752118
R-HSA-6806834	Signaling by MET	3	88	0.00606311	0.0073589	0.139819	6	49	0.00385827	9606	Homo sapiens	COL11A1;STAT3;CHD5		R-HSA-6807008;R-HSA-8874079;R-HSA-2730595;R-HSA-8875817;R-HSA-2730599;R-HSA-8875816
R-HSA-110314	Recognition of DNA damage by PCNA-containing replication complex	2	30	0.00206697	0.00815091	0.146716	3	6	0.000472441	9606	Homo sapiens	NR4A1;LIFR		R-HSA-5652005;R-HSA-5651992;R-HSA-5652009
R-HSA-447115	Interleukin-12 family signaling	3	96	0.0066143	0.00931579	0.158368	15	114	0.00897638	9606	Homo sapiens	IL10;STAT3		R-HSA-8950441;R-HSA-8952749;R-HSA-8950733;R-HSA-8984014;R-HSA-8950724;R-HSA-8950780;R-HSA-8950269;R-HSA-8950782;R-HSA-8981073;R-HSA-8984021;R-HSA-8950485;R-HSA-8950518;R-HSA-8984023;R-HSA-8950583;R-HSA-8952823
R-HSA-68962	Activation of the pre-replicative complex	2	36	0.00248036	0.0115374	0.173061	2	9	0.000708661	9606	Homo sapiens	ITGB3;LIFR		R-HSA-68960;R-HSA-68914
R-HSA-1474290	Collagen formation	3	104	0.0071655	0.0115495	0.173242	27	77	0.00606299	9606	Homo sapiens	COL11A1;COL8A1;MMP20		R-HSA-8948232;R-HSA-8944266;R-HSA-8948234;R-HSA-2002460;R-HSA-2299620;R-HSA-8948224;R-HSA-8948226;R-HSA-1474266;R-HSA-8948228;R-HSA-8948230;R-HSA-8948231;R-HSA-8944218;R-HSA-1981128;R-HSA-2002440;R-HSA-1980233;R-HSA-1981120;R-HSA-1650808;R-HSA-2002428;R-HSA-2022073;R-HSA-2089971;R-HSA-1981104;R-HSA-2213201;R-HSA-2213200;R-HSA-8948219;R-HSA-8948222;R-HSA-2213207;R-HSA-1981157
R-HSA-983712	Ion channel transport	4	207	0.0142621	0.0140596	0.191781	5	41	0.00322835	9606	Homo sapiens	SST;ATP1A2;ATP12A		R-HSA-937311;R-HSA-8863494;R-HSA-2671885;R-HSA-9650165;R-HSA-936897
R-HSA-5696400	Dual Incision in GG-NER	2	41	0.00282486	0.0147524	0.191781	3	3	0.00023622	9606	Homo sapiens	NR4A1;LIFR		R-HSA-5690213;R-HSA-5690990;R-HSA-5690988
R-HSA-8948216	Collagen chain trimerization	2	44	0.00303156	0.0168454	0.197332	2	28	0.00220472	9606	Homo sapiens	COL11A1;COL8A1		R-HSA-8944266;R-HSA-8944218
R-HSA-9648025	EML4 and NUDC in mitotic spindle formation	3	121	0.00833678	0.0172432	0.197332	2	5	0.000393701	9606	Homo sapiens	ERCC6L;TUBAL3;SPC25		R-HSA-9648114;R-HSA-9648017
R-HSA-452723	Transcriptional regulation of pluripotent stem cells	2	45	0.00310045	0.0175696	0.197332	4	35	0.00275591	9606	Homo sapiens	STAT3		R-HSA-2972956;R-HSA-452515;R-HSA-2895778;R-HSA-480520
R-HSA-6798695	Neutrophil degranulation	6	480	0.0330715	0.0204866	0.197332	7	10	0.000787402	9606	Homo sapiens	TCN1;LIPH;CHD5;CACNA1E;MMP20;LTF		R-HSA-6798743;R-HSA-6799350;R-HSA-6800434;R-HSA-6798749;R-HSA-6798748;R-HSA-6800426;R-HSA-6798745
R-HSA-8875791	MET activates STAT3	1	5	0.000344495	0.0221471	0.197332	4	4	0.000314961	9606	Homo sapiens	STAT3		R-HSA-2730595;R-HSA-8875817;R-HSA-2730599;R-HSA-8875816
R-HSA-198745	Signalling to STAT3	1	5	0.000344495	0.0221471	0.197332	1	1	7.87402e-05	9606	Homo sapiens	STAT3		R-HSA-198732
R-HSA-8981607	Intracellular oxygen transport	1	5	0.000344495	0.0221471	0.197332	2	6	0.000472441	9606	Homo sapiens	MB		R-HSA-8981622;R-HSA-8981606
R-HSA-2500257	Resolution of Sister Chromatid Cohesion	3	134	0.00923247	0.0224845	0.197332	4	8	0.000629921	9606	Homo sapiens	ERCC6L;TUBAL3;SPC25		R-HSA-2484822;R-HSA-1638803;R-HSA-2468287;R-HSA-1638821
R-HSA-73893	DNA Damage Bypass	2	57	0.00392724	0.0272426	0.197332	5	34	0.00267717	9606	Homo sapiens	NR4A1;LIFR		R-HSA-5652005;R-HSA-5653840;R-HSA-5653838;R-HSA-5651992;R-HSA-5652009
R-HSA-5663220	RHO GTPases Activate Formins	3	149	0.010266	0.0294964	0.197332	3	27	0.00212598	9606	Homo sapiens	ERCC6L;TUBAL3;SPC25		R-HSA-5666160;R-HSA-5666129;R-HSA-5666169
R-HSA-3000171	Non-integrin membrane-ECM interactions	2	61	0.00420284	0.0308479	0.197332	3	22	0.00173228	9606	Homo sapiens	COL11A1;ITGB3		R-HSA-2327738;R-HSA-2731123;R-HSA-2731074
R-HSA-8849474	PTK6 Activates STAT3	1	7	0.000482293	0.0308701	0.197332	6	9	0.000708661	9606	Homo sapiens	STAT3		R-HSA-8848087;R-HSA-8848150;R-HSA-8848178;R-HSA-2730595;R-HSA-8848124;R-HSA-2730599
R-HSA-5578775	Ion homeostasis	2	64	0.00440954	0.0336691	0.197332	1	15	0.0011811	9606	Homo sapiens	ATP1A2		R-HSA-936897
R-HSA-8935964	RUNX1 regulates expression of components of tight junctions	1	8	0.000551192	0.0352028	0.197332	1	6	0.000472441	9606	Homo sapiens	TBX15		R-HSA-8935988
R-HSA-6782210	Gap-filling DNA repair synthesis and ligation in TC-NER	2	66	0.00454733	0.0356039	0.197332	2	2	0.00015748	9606	Homo sapiens	NR4A1;LIFR		R-HSA-6782227;R-HSA-6782208
R-HSA-6782135	Dual incision in TC-NER	2	68	0.00468513	0.037581	0.197332	6	6	0.000472441	9606	Homo sapiens	NR4A1;LIFR		R-HSA-6782211;R-HSA-6782131;R-HSA-6782224;R-HSA-6782141;R-HSA-6782204;R-HSA-6782138
R-HSA-8950505	Gene and protein expression by JAK-STAT signaling after Interleukin-12 stimulation	2	73	0.00502963	0.0427026	0.197332	1	36	0.00283465	9606	Homo sapiens	IL10		R-HSA-8981073
R-HSA-1650814	Collagen biosynthesis and modifying enzymes	2	76	0.00523632	0.045894	0.197332	22	51	0.00401575	9606	Homo sapiens	COL11A1;COL8A1		R-HSA-8948232;R-HSA-1650808;R-HSA-8944266;R-HSA-2002428;R-HSA-8948234;R-HSA-2002460;R-HSA-2022073;R-HSA-8948224;R-HSA-8948226;R-HSA-2089971;R-HSA-8948228;R-HSA-1981104;R-HSA-8948230;R-HSA-8948231;R-HSA-8944218;R-HSA-8948219;R-HSA-8948222;R-HSA-1981128;R-HSA-2002440;R-HSA-1980233;R-HSA-1981157;R-HSA-1981120
R-HSA-9020933	Interleukin-23 signaling	1	11	0.000757889	0.0480868	0.197332	6	12	0.000944882	9606	Homo sapiens	STAT3		R-HSA-8950780;R-HSA-8950269;R-HSA-8952749;R-HSA-8950724;R-HSA-8950583;R-HSA-8952823
R-HSA-8985947	Interleukin-9 signaling	1	11	0.000757889	0.0480868	0.197332	5	12	0.000944882	9606	Homo sapiens	STAT3		R-HSA-8985929;R-HSA-8985981;R-HSA-8985900;R-HSA-8985966;R-HSA-8985988
R-HSA-111453	BH3-only proteins associate with and inactivate anti-apoptotic BCL-2 members	1	11	0.000757889	0.0480868	0.197332	1	4	0.000314961	9606	Homo sapiens	STAT3		R-HSA-6790025
R-HSA-351906	Apoptotic cleavage of cell adhesion proteins	1	11	0.000757889	0.0480868	0.197332	1	10	0.000787402	9606	Homo sapiens	TBX15		R-HSA-351876
